# Supplementary material
Source: PubMed Central journal article supplement (PMC2865203)
Supplement: NIHMS186337-supplement-1.pdf [file NIHMS186337-supplement-1.pdf]

# Supplementary Figure 1

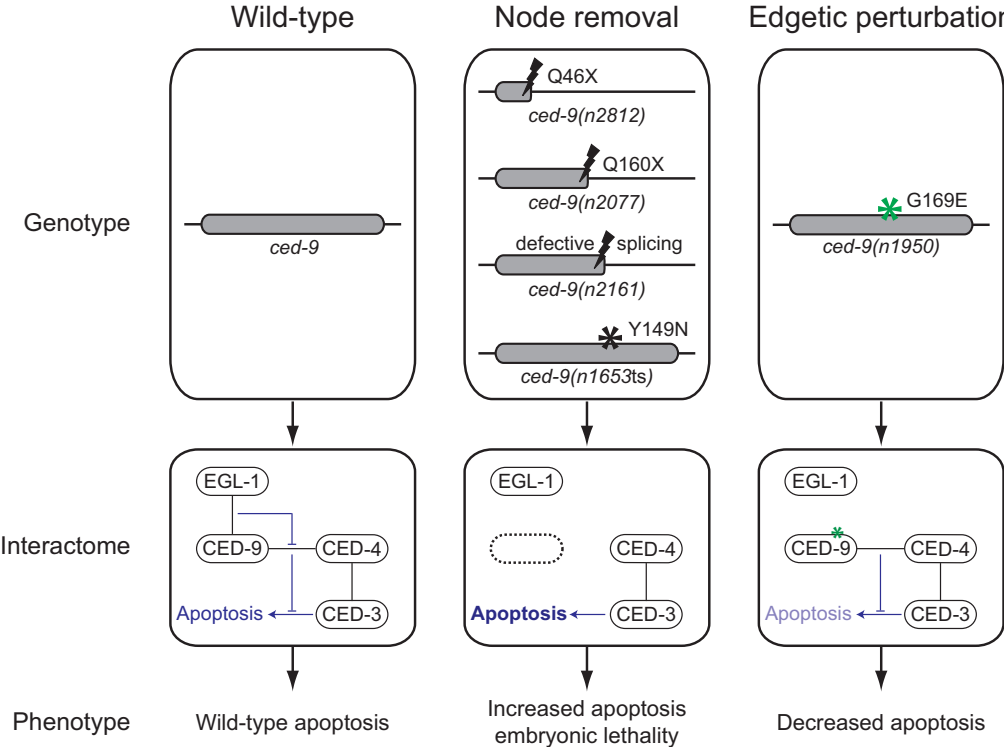

**Supplementary Figure 1** | Summary of *ced-9* alleles described in the literature. Schematic representation of known *ced-9* alleles with their impact on CED-9-mediated protein-protein interactions and phenotypes. *ced-9(n1653ts)* is a temperature sensitive mutant. Lightning bolts and stars: truncating and missense mutations, respectively.

**Supplementary Figure 2**

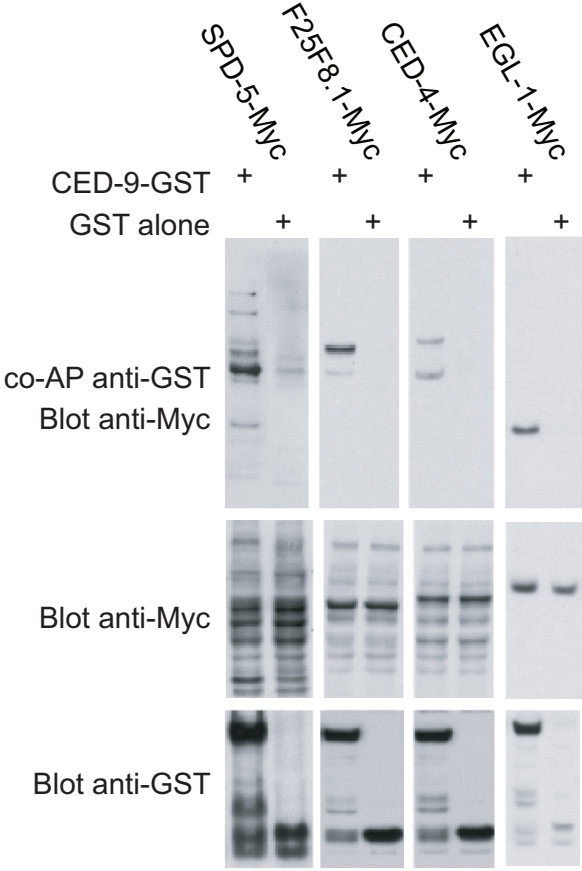

**Supplementary Figure 2** | Co-affinity purification (co-AP) of Myc-tagged interactors by GST-CED-9 or by an empty GST vector (top panel). Western blot anti-Myc or anti-GST on crude extracts (middle and bottom panels, respectively).

**Supplementary Figure 3**

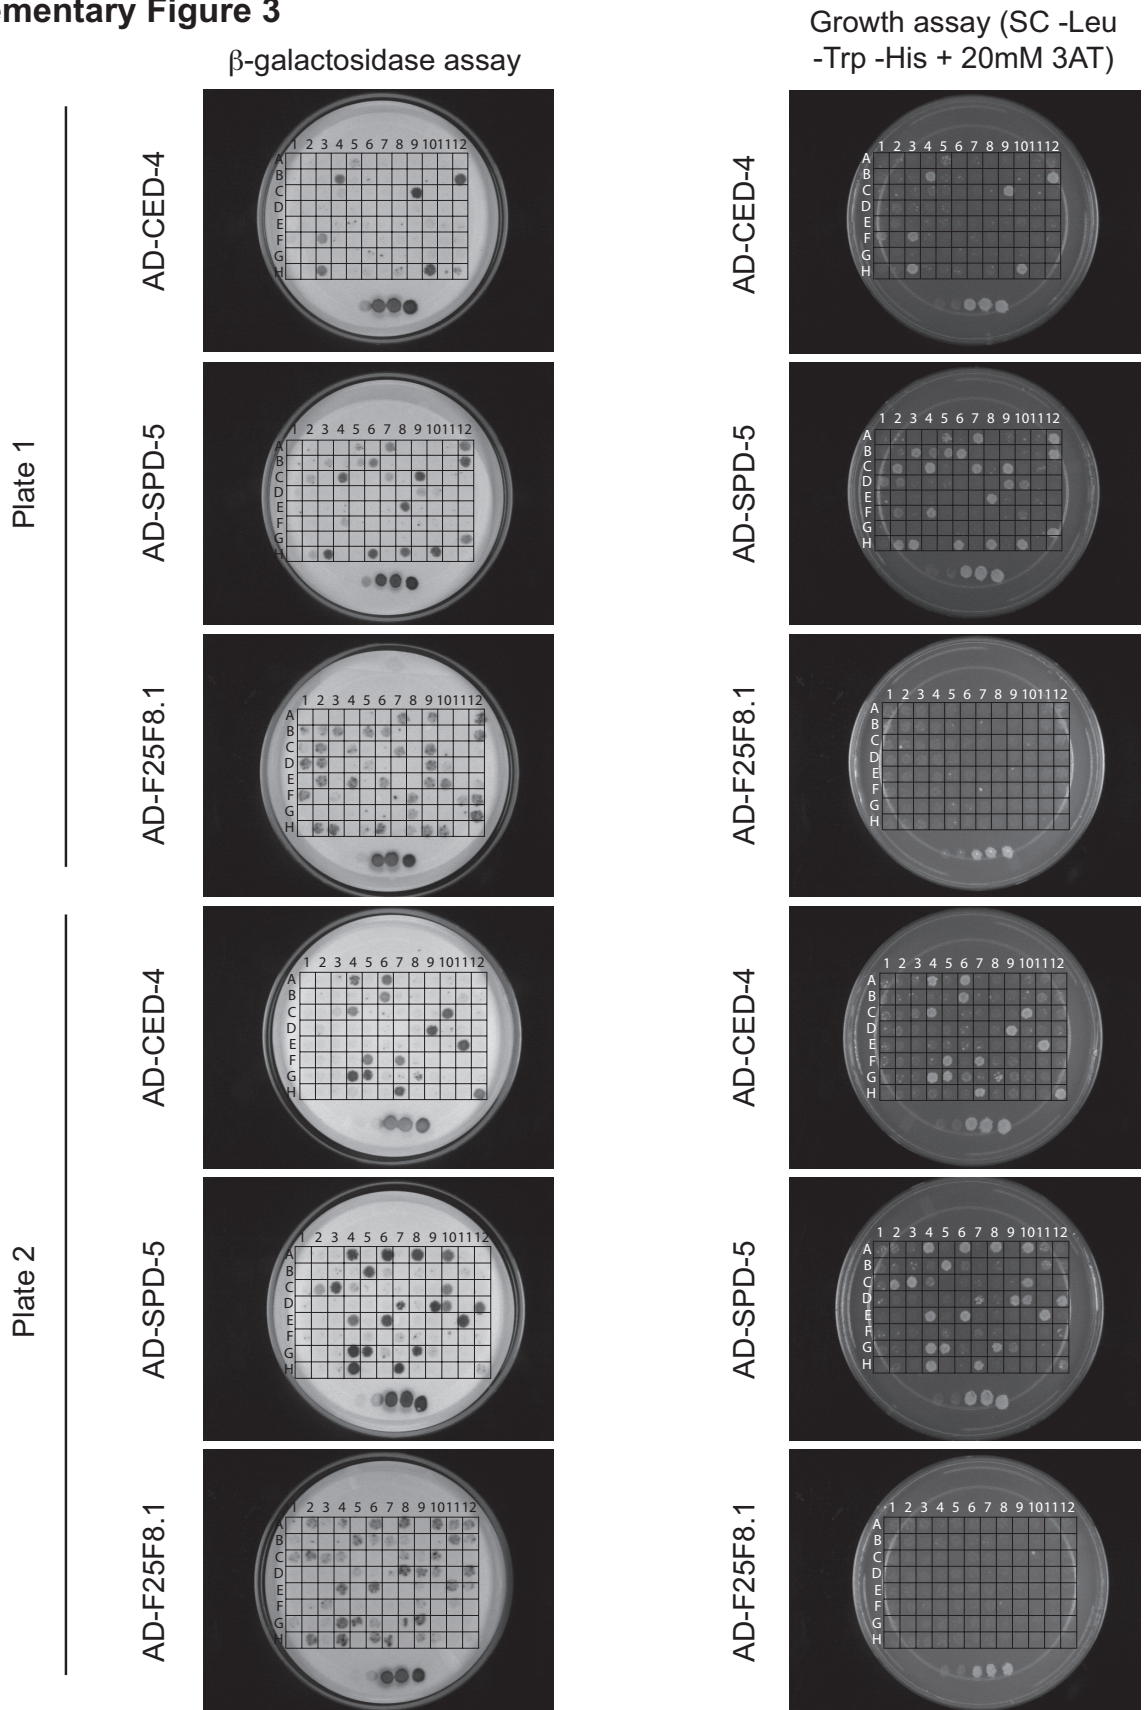

**Supplementary Figure 3** | Confirmation of interaction loss of alleles identified by R-Y2H against CED-4 and test of interaction with SPD-5 and F25F8.1. *ced-9* alleles are expressed as DB-fusions. Sequence information and scoring are in Supplementary Table 2.

## Supplementary Figure 4

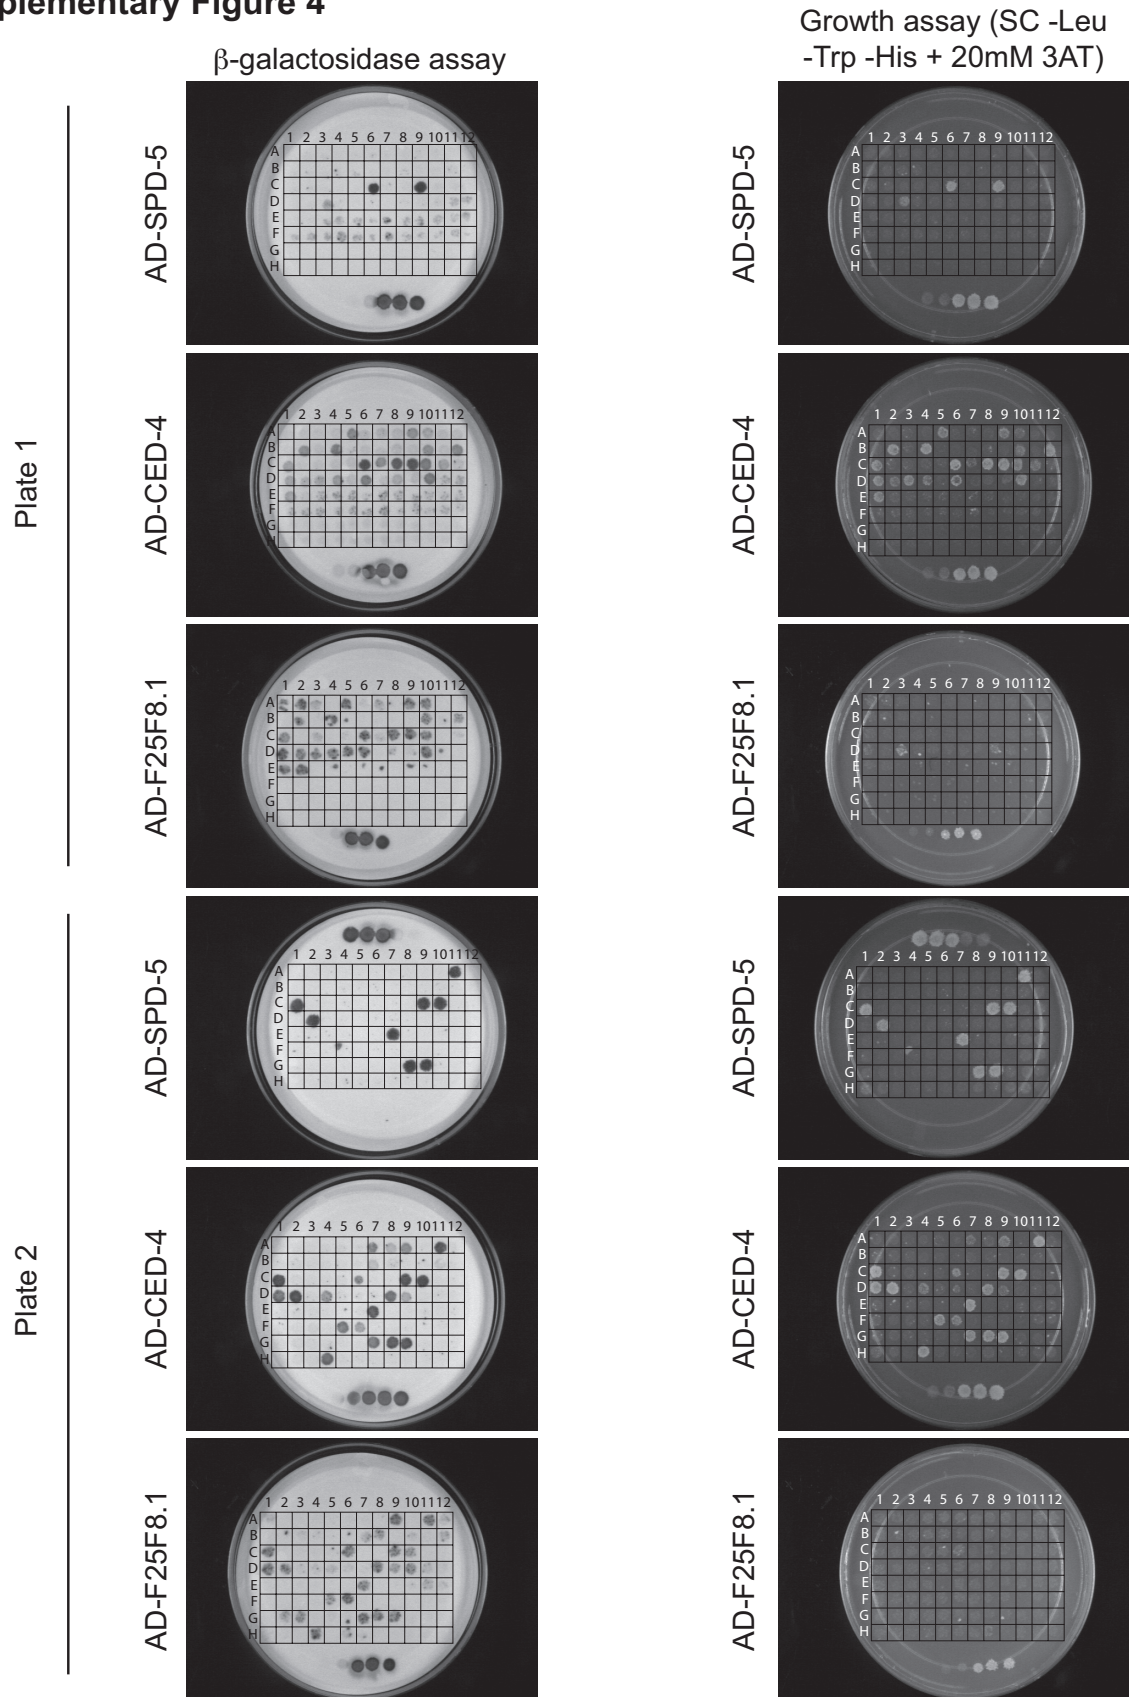

**Supplementary Figure 4** | Confirmation of interaction loss of alleles identified by R-Y2H against SPD-5 and test of interaction with CED-4 and F25F8.1. *ced-9* alleles are expressed as DB-fusions. Sequence information and scoring are in Supplementary Table 3.



## Supplementary Figure 5

DB-CED-9 $\Delta$ TM mutants library/AD-F25F8.1 co-transformed colonies phenotype ( $\beta$ -galactosidase assay)

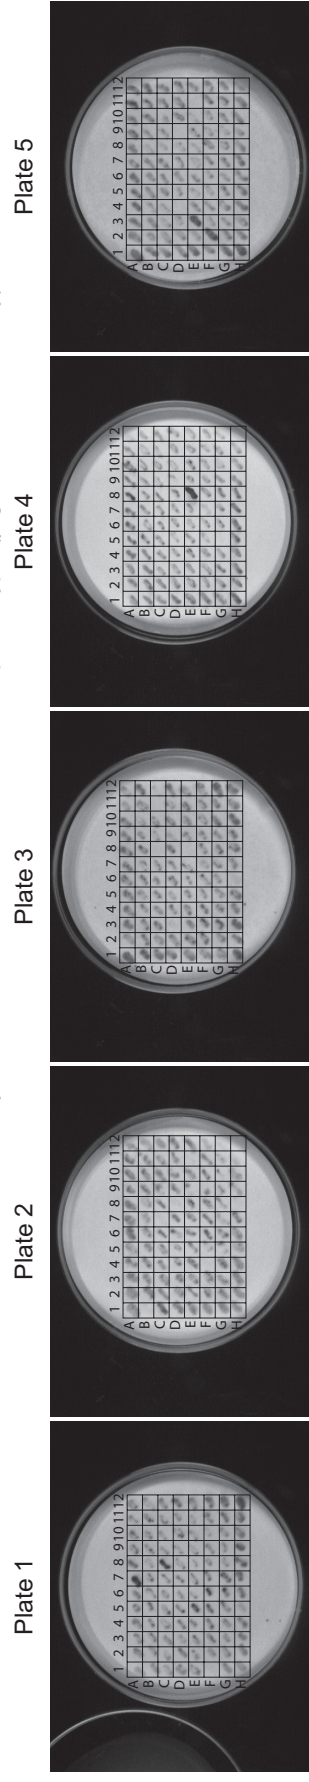

Loss of interaction  
confirmation against  
AD-F25F8.1

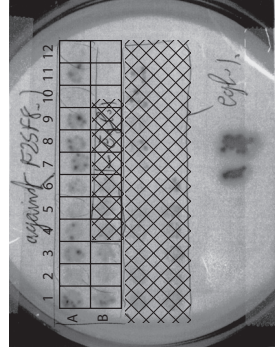

Interaction detection  
against SPD-5 and CED-4  
 $\beta$ -galactosidase assay

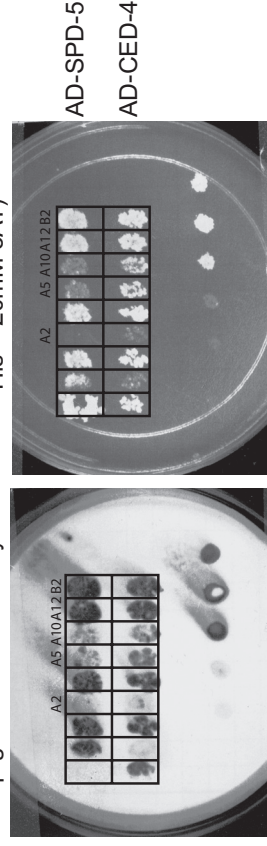

Growth assay (SC -Leu -Trp  
-His + 20mM 3AT)

**Supplementary Figure 5** | Identification of *ced-9* alleles defective for interaction with F25F8.1. Yeast cells co-transformed with DB-CED-9 mutants and AD-F25F8.1 are assayed for loss of interaction by Y2H ( $\beta$ -galactosidase assay - top panel). Confirmation of interaction loss of alleles identified by Y2H against F25F8.1 (middle panel). They are then tested for interaction against SPD-5 and CED-4 (black boxes - bottom panel). Their names correspond to their position on the loss of interaction confirmation test plate. *ced-9* alleles are expressed as DB-fusions, CED-9 interacting partners are expressed as AD-fusions. Sequence information and scoring are in Supplementary Table 4.

## Supplementary Figure 6

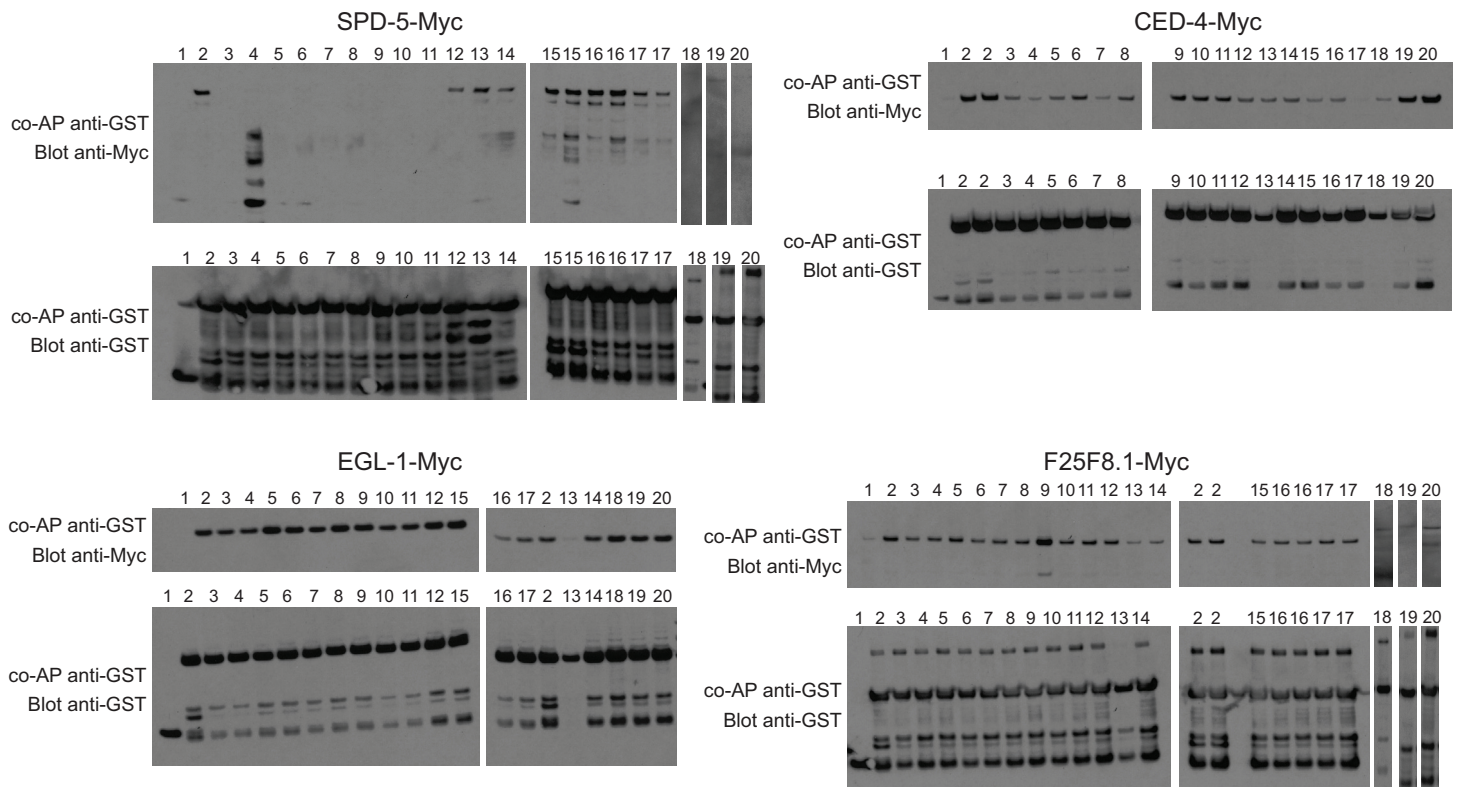

|    | Amino acid position | Wild-type amino acid | Mutant amino acid | co-AP scoring |       |         |       | Specific for | Confirmed |
|----|---------------------|----------------------|-------------------|---------------|-------|---------|-------|--------------|-----------|
|    |                     |                      |                   | CED-4         | SPD-5 | F25F8.1 | EGL-1 |              |           |
| 1  | Negative ctl        | N/A                  | N/A               | -             | -     | -       | -     | N/A          | N/A       |
| 2  | Wild-type           | N/A                  | N/A               | +++           | +++   | +++     | +++   | N/A          | N/A       |
| 3  | 73                  | Trp                  | Arg               | ++            | -     | +++     | +++   | SPD-5        | Yes       |
| 4  | 77                  | Arg                  | Gly               | +             | -     | +++     | +++   | SPD-5        | Yes       |
| 5  | 77                  | Arg                  | Ser               | ++            | -     | +++     | +++   | SPD-5        | Yes       |
| 6  | 82                  | Gly                  | Glu               | +++           | -     | +++     | +++   | SPD-5        | Yes       |
| 7  | 110                 | Gln                  | Arg               | +             | -     | +++     | +++   | SPD-5        | Yes       |
| 8  | 168                 | Tyr                  | His               | ++            | -     | +++     | +++   | SPD-5        | Yes       |
| 9  | 214                 | Trp                  | Arg               | +++           | -     | +++     | +++   | SPD-5        | Yes       |
| 10 | 220                 | Ser                  | Gly               | +++           | -     | +++     | +++   | SPD-5        | Yes       |
| 11 | 220                 | Ser                  | Ile               | +++           | -     | +++     | +++   | SPD-5        | Yes       |
| 12 | 79                  | Asp                  | Gly               | +             | ++    | +++     | +++   | CED-4        | No        |
| 13 | 79                  | Asp                  | Ala               | +++           | +++   | ++      | ++    | CED-4        | No        |
| 14 | 79                  | Asp                  | Gly               | +             | ++    | ++      | +++   | CED-4        | No        |
| 15 | 100                 | Phe                  | Leu               | +             | +++   | +++     | +++   | CED-4        | No        |
| 16 | 143                 | Arg                  | Gly               | ++            | +++   | +++     | ++    | CED-4        | No        |
| 17 | 207                 | Lys                  | Glu               | -             | ++    | +++     | +++   | CED-4        | Yes       |
| 18 | 88                  | Phe                  | Ser               | ++            | -     | +       | +++   | *            | *         |
| 19 | 184                 | Lys                  | Glu               | +++           | +     | +       | +++   | F25F8.1      | No        |
| 20 | 136                 | Glu                  | Ala               | +++           | -     | ++      | +++   | F25F8.1      | No        |

**Supplementary Figure 6** | Co-affinity purifications (co-AP) of CED-9 edgetic mutants with Myc-tagged CED-4, EGL-1, SPD-5 and F25F8.1. Anti-Myc and anti-GST immunoprecipitation blots and table summary of quantifications. The \* symbol indicates that this mutant is a non-edgetic allele from the R-Y2H screens that was used as negative control. co-AP: co-Affinity Purification, ctl: control, N/A : Not Applicable.

## Supplementary Figure 7

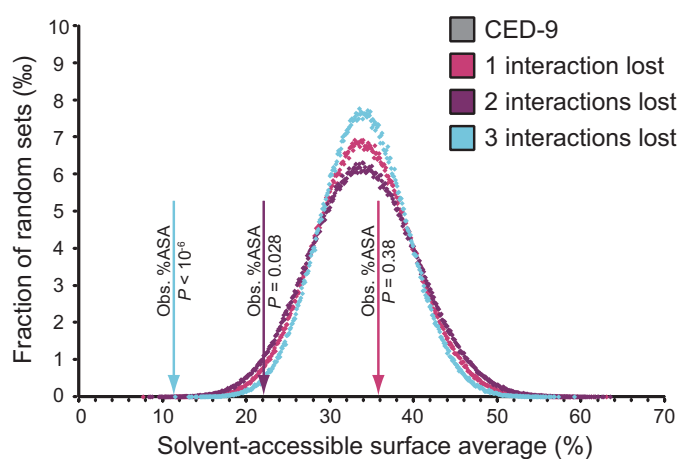

**Supplementary Figure 7** | Distribution of the average relative solvent-accessible surface area obtained for 1,000,000 random sets of 19, 16 or 23 residues, compared to the average relative solvent-accessible surface area (or “Obs. %ASA”) of the residues mutated in alleles defective for one, two or three interactions, respectively.





**Supplementary Figure 9**

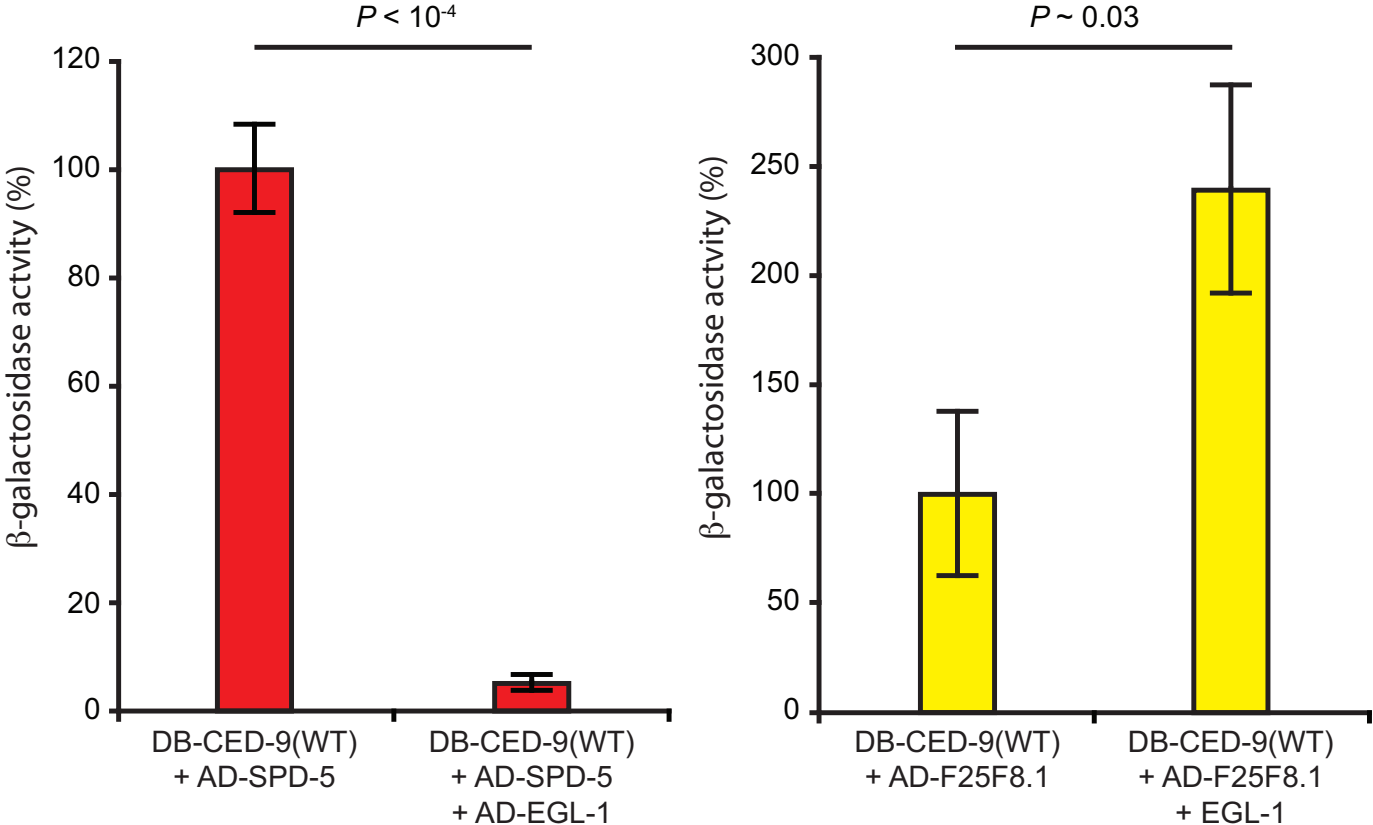

**Supplementary Figure 9** | Y2H phenotypes (quantitative  $\beta$ -galactosidase assay) of interactions between CED-9/SPD-5 and CED-9/F25F8.1 in absence or presence of EGL-1. Errors bars represent standard error of the mean.

## Supplementary Figure 10

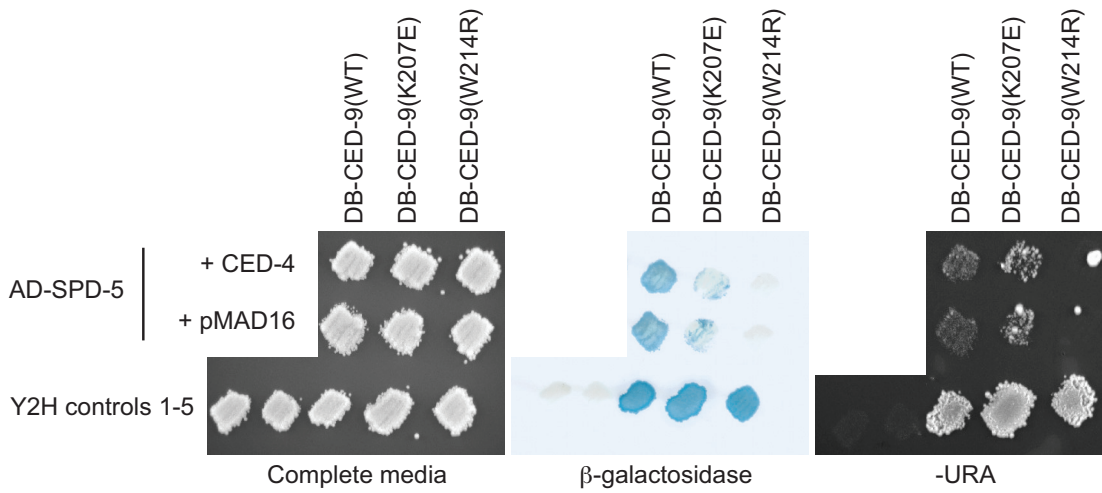

**Supplementary Figure 10** | Y2H phenotypes of the interaction between SPD-5 and CED-9 (wild-type or K207E or W214R) in absence or presence of CED-4. Complete media (selecting only for yeast cells containing all three plasmid vectors - left); filter  $\beta$ -galactosidase assay (middle); growth assay on media without uracil (right).

## Supplementary Table 1

| Amino acid position | WT codon     | Mutant codon | WT amino acid | Mutant amino acid | Number of times found |
|---------------------|--------------|--------------|---------------|-------------------|-----------------------|
| 11                  | <u>A</u> CG  | <u>G</u> CG  | Thr           | Ala               | 1                     |
| 20                  | <u>A</u> TG  | <u>G</u> TG  | Met           | Val               | 1                     |
| 20                  | A <u>T</u> G | A <u>C</u> G | Met           | Thr               | 1                     |
| 30                  | <u>G</u> GG  | <u>G</u> GA  | Gly           | Gly               | 1                     |
| 48                  | <u>T</u> IG  | <u>T</u> CG  | Leu           | Ser               | 1                     |
| 83                  | <u>I</u> TT  | <u>C</u> TT  | Phe           | Leu               | 1                     |
| 93                  | <u>C</u> GG  | <u>G</u> GG  | Arg           | Gly               | 1                     |
| 112                 | <u>G</u> AG  | <u>G</u> AA  | Glu           | Glu               | 1                     |
| 117                 | <u>C</u> GA  | <u>C</u> GG  | Arg           | Arg               | 1                     |
| 124                 | <u>G</u> AG  | <u>G</u> CG  | Glu           | Ala               | 1                     |
| 128                 | <u>G</u> CG  | <u>G</u> CA  | Ala           | Ala               | 1                     |
| 154                 | <u>C</u> GG  | <u>C</u> GA  | Arg           | Arg               | 1                     |
| 167                 | <u>I</u> CT  | <u>C</u> CT  | Ser           | Pro               | 1                     |
| 214                 | <u>I</u> GG  | <u>C</u> GG  | Trp           | Arg               | 1                     |
| 232                 | <u>A</u> AA  | <u>G</u> AA  | Lys           | Glu               | 1                     |
| WT                  |              |              |               |                   | 62                    |

**Supplementary Table 1** | Mutations identified in a random set of 100 clones from the CED-9 $\Delta$ TM mutant library. Out of 100 clones, 77 were successfully sequenced and were full-length, the remaining 23 were not successfully sequenced.

# Supplementary Table 2

| Screen | Location in the plate |     |        | Sequence information |         |                              |      |      |      | Interaction with |       |         | F-Y2H Retest | Mutation(s) |            |
|--------|-----------------------|-----|--------|----------------------|---------|------------------------------|------|------|------|------------------|-------|---------|--------------|-------------|------------|
|        | Plate                 | Row | Column | nucleotide #         | codon-1 | codon-2                      | AA # | AA-1 | AA-2 | CED-4            | SPD-5 | F25F8.1 |              | Number      | Type       |
| CED-4  | 1                     | A   | 1      | 143                  | TTG     | TAG                          | 48   | Leu  | STOP | -                | -     | -       | yes          | 1           | nonsense   |
| CED-4  | 1                     | A   | 2      | 49                   | CGA     | TGA                          | 17   | Arg  | STOP | -                | -     | -       | yes          | 1           | frameshift |
| CED-4  | 1                     | A   | 3      | 93                   | ND      | 1 bp deletion => frameshift  | ND   | ND   | ND   | -                | -     | -       | yes          | 1           | ND         |
| CED-4  | 1                     | A   | 4      | ND                   | ND      | ND                           | ND   | ND   | ND   | -                | -     | -       | yes          | 1           | ND         |
| CED-4  | 1                     | A   | 5      | 1st-611              | CTG     | CGG                          | 204  | Leu  | Pro  | +                | +     | -       | no           | 2           | missense   |
| CED-4  | 1                     | A   | 5      | 2nd-620              | AAA     | AGA                          | 207  | Lys  | Arg  | +                | +     | -       | no           | 2           | missense   |
| CED-4  | 1                     | A   | 6      | 45                   | TAT     | TAG                          | 15   | Tyr  | STOP | -                | -     | -       | yes          | 1           | nonsense   |
| CED-4  | 1                     | A   | 7      | ND                   | ND      | ND                           | ND   | ND   | ND   | -                | ++    | +++     | yes          | ND          | ND         |
| CED-4  | 1                     | A   | 8      | 93                   | ND      | 1 bp deletion => frameshift  | ND   | ND   | ND   | -                | -     | -       | yes          | 1           | frameshift |
| CED-4  | 1                     | A   | 9      | 608                  | TTG     | TTG                          | 203  | Ser  | Leu  | -                | -     | +++     | yes          | 1           | SAC        |
| CED-4  | 1                     | A   | 10     | 219                  | TGG     | TGA                          | 73   | Trp  | STOP | -                | -     | -       | yes          | 1           | nonsense   |
| CED-4  | 1                     | A   | 11     | 526                  | TCG     | CGG                          | 176  | Ser  | Pro  | -                | -     | -       | yes          | 1           | SAC        |
| CED-4  | 1                     | A   | 12     | 1st-298              | TTT     | CTT                          | 100  | Phe  | Leu  | -                | ++    | +++     | yes          | 2           | missense   |
| CED-4  | 1                     | A   | 12     | 2nd-635              | AAC     | AGC                          | 212  | Asn  | Ser  | -                | ++    | +++     | yes          | 2           | missense   |
| CED-4  | 1                     | B   | 1      | 1st-338              | CAC     | CGC                          | 113  | His  | Arg  | -                | -     | +       | yes          | 2           | SAC        |
| CED-4  | 1                     | B   | 1      | 2nd-360              | GGA     | GGG                          | 120  | Gly  | Gly  | -                | -     | +       | yes          | 2           | synonymous |
| CED-4  | 1                     | B   | 2      | 1st-244              | GGA     | AGA                          | 82   | Gly  | Arg  | -                | -     | +       | yes          | 2           | missense   |
| CED-4  | 1                     | B   | 2      | 2nd-731              | GGA     | GAA                          | 244  | Gly  | Glu  | -                | -     | +       | yes          | 2           | missense   |
| CED-4  | 1                     | B   | 3      | 236                  | GAT     | GGT                          | 79   | Asp  | Gly  | -                | +     | ++      | yes          | 1           | SAC        |
| CED-4  | 1                     | B   | 4      | 416                  | CTC     | CAC                          | 139  | Leu  | His  | ++               | -     | -       | no           | 1           | SAC        |
| CED-4  | 1                     | B   | 5      | 1st-236              | GAT     | GGT                          | 79   | Asp  | Gly  | -                | +     | ++      | yes          | 2           | SAC        |
| CED-4  | 1                     | B   | 5      | 2nd-324              | GGA     | GGG                          | 108  | Gly  | Gly  | -                | +     | ++      | yes          | 2           | synonymous |
| CED-4  | 1                     | B   | 6      | 317                  | CCG     | CAG                          | 106  | Pro  | Gln  | -                | ++    | ++      | yes          | 1           | SAC        |
| CED-4  | 1                     | B   | 7      | 3                    | CGA     | 1 bp insertion => frameshift | Arg  | STOP | -    | -                | -     | -       | yes          | 1           | frameshift |
| CED-4  | 1                     | B   | 8      | 172                  | CGA     | TGA                          | 58   | Arg  | STOP | -                | -     | -       | yes          | 1           | nonsense   |
| CED-4  | 1                     | B   | 9      | 93                   | CGA     | 1 bp deletion => frameshift  | Arg  | STOP | -    | -                | -     | -       | yes          | 1           | frameshift |
| CED-4  | 1                     | B   | 10     | 49                   | CGA     | TGA                          | 17   | Arg  | STOP | -                | -     | -       | yes          | 1           | nonsense   |
| CED-4  | 1                     | B   | 11     | 358                  | GGA     | AGA                          | 120  | Gly  | Arg  | -                | -     | -       | yes          | 1           | SAC        |
| CED-4  | 1                     | B   | 12     | WT                   | WT      | WT                           | WT   | WT   | WT   | +++              | +++   | +++     | no           | 0           | WT         |
| CED-4  | 1                     | C   | 1      | 334                  | GAG     | AAG                          | 112  | Glu  | Lys  | -                | -     | +       | yes          | 1           | SAC        |
| CED-4  | 1                     | C   | 2      | 236                  | GAT     | GGT                          | 79   | Asp  | Gly  | -                | +     | +++     | yes          | 1           | SAC        |
| CED-4  | 1                     | C   | 3      | 611                  | CTG     | CCG                          | 204  | Leu  | Pro  | -                | -     | -       | yes          | 1           | SAC        |
| CED-4  | 1                     | C   | 4      | 427                  | AGA     | GGA                          | 143  | Arg  | Gly  | -                | +++   | +       | yes          | 1           | SAC        |
| CED-4  | 1                     | C   | 5      | 335                  | GAG     | GGG                          | 112  | Glu  | Gly  | -                | -     | -       | yes          | 1           | SAC        |
| CED-4  | 1                     | C   | 6      | 80                   | ND      | 7 bp deletion => frameshift  | ND   | ND   | ND   | -                | -     | -       | yes          | 1           | frameshift |
| CED-4  | 1                     | C   | 7      | ND                   | ND      | ND                           | ND   | ND   | ND   | -                | +     | ++      | yes          | ND          | ND         |
| CED-4  | 1                     | C   | 8      | 52                   | CGA     | TGA                          | 18   | Arg  | STOP | -                | -     | -       | yes          | 1           | nonsense   |
| CED-4  | 1                     | C   | 9      | WT                   | WT      | WT                           | WT   | WT   | WT   | +++              | +++   | +++     | no           | 0           | WT         |
| CED-4  | 1                     | C   | 10     | 536                  | GGT     | GAT                          | 179  | Gly  | Asp  | -                | -     | -       | yes          | 1           | SAC        |
| CED-4  | 1                     | C   | 11     | ND                   | ND      | ND                           | ND   | ND   | ND   | -                | -     | -       | yes          | ND          | ND         |
| CED-4  | 1                     | C   | 12     | 335                  | GAG     | GGG                          | 112  | Glu  | Gly  | -                | -     | -       | yes          | 1           | SAC        |
| CED-4  | 1                     | D   | 1      | 236                  | GAT     | GGT                          | 79   | Asp  | Gly  | -                | -     | +++     | yes          | 1           | SAC        |
| CED-4  | 1                     | D   | 2      | 242                  | GAG     | GGG                          | 81   | Glu  | Gly  | -                | -     | +++     | yes          | 1           | SAC        |
| CED-4  | 1                     | D   | 3      | 586                  | CGA     | TGA                          | 196  | Arg  | STOP | -                | -     | -       | yes          | 1           | nonsense   |
| CED-4  | 1                     | D   | 4      | 611                  | CTG     | CCG                          | 204  | Leu  | Pro  | -                | -     | -       | yes          | 1           | SAC        |
| CED-4  | 1                     | D   | 5      | 244                  | GGA     | AGA                          | 82   | Gly  | Arg  | -                | -     | +       | yes          | 1           | SAC        |
| CED-4  | 1                     | D   | 6      | ND                   | ND      | ND                           | ND   | ND   | ND   | -                | -     | -       | yes          | ND          | ND         |
| CED-4  | 1                     | D   | 7      | 114                  | ND      | 1 bp deletion => frameshift  | ND   | ND   | ND   | -                | -     | -       | yes          | 1           | frameshift |
| CED-4  | 1                     | D   | 8      | 93                   | ND      | ND                           | ND   | ND   | ND   | -                | -     | -       | yes          | 1           | frameshift |
| CED-4  | 1                     | D   | 9      | ND                   | ND      | ND                           | ND   | ND   | ND   | -                | +     | +++     | yes          | ND          | ND         |
| CED-4  | 1                     | D   | 10     | 318                  | CCG     | CTG                          | 106  | Pro  | Leu  | -                | -     | -       | yes          | 1           | SAC        |
| CED-4  | 1                     | D   | 11     | 219                  | TGG     | TGA                          | 73   | Trp  | STOP | -                | -     | -       | yes          | 1           | nonsense   |
| CED-4  | 1                     | D   | 12     | 52                   | CGA     | TGA                          | 18   | Arg  | STOP | -                | -     | -       | yes          | 1           | nonsense   |
| CED-4  | 1                     | E   | 1      | 526                  | TCG     | CCG                          | 176  | Ser  | Pro  | -                | -     | -       | yes          | 1           | SAC        |
| CED-4  | 1                     | E   | 2      | 242                  | GAG     | GGG                          | 81   | Glu  | Gly  | -                | -     | +++     | yes          | 1           | SAC        |
| CED-4  | 1                     | E   | 3      | 172                  | CGA     | TGA                          | 58   | Arg  | STOP | -                | -     | -       | yes          | 1           | nonsense   |
| CED-4  | 1                     | E   | 4      | 236                  | GAT     | GGT                          | 79   | Asp  | Gly  | -                | -     | +++     | yes          | 1           | SAC        |
| CED-4  | 1                     | E   | 5      | ND                   | ND      | ND                           | ND   | ND   | ND   | -                | -     | -       | yes          | ND          | ND         |
| CED-4  | 1                     | E   | 6      | 247                  | TTT     | CTT                          | 83   | Phe  | Leu  | -                | -     | ++      | yes          | 1           | SAC        |
| CED-4  | 1                     | E   | 7      | 607                  | TCG     | CCG                          | 203  | Ser  | Pro  | -                | -     | -       | yes          | 1           | SAC        |
| CED-4  | 1                     | E   | 8      | 526                  | TCG     | CCG                          | 176  | Ser  | Pro  | -                | +++   | -       | yes          | 1           | SAC        |
| CED-4  | 1                     | E   | 9      | 247                  | TTT     | CTT                          | 83   | Phe  | Leu  | -                | -     | +++     | yes          | 1           | SAC        |
| CED-4  | 1                     | E   | 10     | 242                  | GAG     | GGG                          | 81   | Glu  | Gly  | -                | -     | +++     | yes          | 1           | SAC        |
| CED-4  | 1                     | E   | 11     | 593                  | CTC     | CCC                          | 198  | Leu  | Pro  | -                | -     | -       | yes          | 1           | SAC        |
| CED-4  | 1                     | E   | 12     | ND                   | ND      | ND                           | ND   | ND   | ND   | -                | -     | -       | yes          | ND          | ND         |
| CED-4  | 1                     | F   | 1      | 1st-174              | CGA     | CGG                          | 58   | Arg  | Arg  | -                | -     | +++     | yes          | 3           | synonymous |
| CED-4  | 1                     | F   | 1      | 2nd-329              | CAA     | CGA                          | 110  | Gln  | Arg  | -                | -     | +++     | yes          | 3           | missense   |
| CED-4  | 1                     | F   | 1      | 3rd-739              | AAG     | GAG                          | 247  | Lys  | Glu  | -                | -     | +++     | yes          | 3           | missense   |
| CED-4  | 1                     | F   | 2      | 143                  | TTG     | TAG                          | 48   | Leu  | STOP | -                | -     | -       | yes          | 1           | nonsense   |
| CED-4  | 1                     | F   | 3      | 592                  | CCT     | CTC                          | 198  | Pro  | Leu  | ++               | -     | +       | no           | 1           | SAC        |
| CED-4  | 1                     | F   | 4      | 536                  | GGT     | GAT                          | 179  | Gly  | Asp  | -                | +     | -       | yes          | 1           | SAC        |
| CED-4  | 1                     | F   | 5      | 93                   | ND      | 1 bp deletion => frameshift  | ND   | ND   | ND   | -                | -     | -       | yes          | 1           | frameshift |
| CED-4  | 1                     | F   | 6      | ND                   | ND      | ND                           | ND   | ND   | ND   | -                | -     | -       | yes          | ND          | ND         |
| CED-4  | 1                     | F   | 7      | ND                   | ND      | ND                           | ND   | ND   | ND   | -                | -     | -       | yes          | ND          | ND         |
| CED-4  | 1                     | F   | 8      | 1st-298              | TTT     | CTT                          | 100  | Phe  | Leu  | -                | -     | ++      | yes          | 2           | missense   |
| CED-4  | 1                     | F   | 8      | 2nd-635              | AAC     | AGC                          | 212  | Asn  | Ser  | -                | -     | ++      | yes          | 2           | missense   |
| CED-4  | 1                     | F   | 9      | 611                  | CTG     | CCG                          | 204  | Leu  | Pro  | -                | -     | -       | yes          | 1           | SAC        |
| CED-4  | 1                     | F   | 10     | 210                  | ND      | 1 bp deletion => frameshift  | ND   | ND   | ND   | -                | -     | -       | yes          | 1           | frameshift |
| CED-4  | 1                     | F   | 11     | ND                   | ND      | ND                           | ND   | ND   | ND   | -                | -     | +       | yes          | ND          | ND         |
| CED-4  | 1                     | F   | 12     | 1st-247              | TTT     | CTT                          | 83   | Phe  | Leu  | -                | -     | +++     | yes          | 2           | missense   |
| CED-4  | 1                     | G   | 1      | 2nd-367              | TTG     | CTC                          | 123  | Phe  | Leu  | -                | -     | +++     | yes          | 2           | missense   |
| CED-4  | 1                     | G   | 2      | 49                   | CGA     | TGA                          | 17   | Arg  | STOP | -                | -     | -       | yes          | 1           | nonsense   |
| CED-4  | 1                     | G   | 2      | 114                  | CGA     | 1 bp deletion => frameshift  | Arg  | STOP | -    | -                | -     | -       | yes          | 1           | frameshift |
| CED-4  | 1                     | G   | 3      | 218                  | TGG     | TAG                          | 73   | Trp  | STOP | -                | -     | -       | yes          | 1           | nonsense   |
| CED-4  | 1                     | G   | 4      | 93                   | ND      | 1 bp deletion => frameshift  | ND   | ND   | ND   | -                | -     | -       | yes          | 1           | frameshift |
| CED-4  | 1                     | G   | 5      | ND                   | ND      | ND                           | ND   | ND   | ND   | -                | -     | -       | yes          | ND          | ND         |
| CED-4  | 1                     | G   | 6      | 413                  | CTG     | CCG                          | 138  | Leu  | Pro  | -                | -     | -       | yes          | 1           | SAC        |
| CED-4  | 1                     | G   | 7      | 607                  | TCG     | CCG                          | 203  | Ser  | Pro  | -                | -     | -       | yes          | 1           | SAC        |
| CED-4  | 1                     | G   | 8      | 233                  | CTT     | CCT                          | 78   | Leu  | Pro  | -                | -     | +       | yes          | 1           | SAC        |
| CED-4  | 1                     | G   | 9      | 1st-468              | GTT     | GTC                          | 156  | Val  | Val  | -                | -     | -       | yes          | 2           | synonymous |
| CED-4  | 1                     | G   | 9      | 2nd-604              | ACA     | CCA                          | 202  | Thr  | Pro  | -                | -     | -       | yes          | 2           | SAC        |
| CED-4  | 1                     | G   | 10     | ND                   | ND      | ND                           | ND   | ND   | ND   | -                | -     | -       | yes          | ND          | ND         |
| CED-4  | 1                     | G   | 11     | 49                   | CGA     | TGA                          | 17   | Arg  | STOP | -                | -     | -       | yes          | 1           | nonsense   |
| CED-4  | 1                     | G   | 12     | ND                   | ND      | ND                           | ND   | ND   | ND   | -                | ++    | +++     | yes          | ND          | ND         |
| CED-4  | 1                     | H   | 1      | 1st-242              | GAG     | GGG                          | 81   | Glu  | Gly  | -                | -     | -       | yes          | 2           | missense   |
| CED-4  | 1                     | H   | 1      | 2nd-611              | CTG     | CCG                          | 204  | Leu  | Pro  | -                | -     | -       | yes          | 2           | missense   |
| CED-4  | 1                     | H   | 2      | 236                  | GAT     | GGT                          | 79   | Asp  | Gly  | -                | +     | +++     | yes          | 1           | SAC        |
| CED-4  | 1                     | H   | 3      | 1st-77               | AAG     | AGG                          | 26   | Lys  | Arg  | ++               | +++   | +++     | no           | 2           | missense   |
| CED-4  | 1                     | H   | 3      | 2nd-377              | AAG     | ATG                          | 126  | Lys  | Met  | ++               | +++   | +++     | no           | 2           | missense   |
| CED-4  | 1                     | H   | 4      | ND                   | ND      | ND                           | ND   | ND   | ND   | -                | -     | -       | yes          | ND          | ND         |
| CED-4  | 1                     | H   | 5      | ND                   | ND      | ND                           | ND   | ND   | ND   | -                | -     | +       | yes          | ND          | ND         |
| CED-4  | 1                     | H   | 6      | 298                  | TTT     | CTT                          | 100  | Phe  | Leu  | -                | +++   | +++     | yes          | 1           | SAC        |
| CED-4  | 1                     | H   | 7      | 335                  | GAG     | GGG                          | 112  | Glu  | Gly  | -                | -     | -       | yes          | 1           | SAC        |
| CED-4  | 1                     | H   | 8      | ND                   | ND      | ND                           | ND   | ND   | ND   | -                | ++    | -       | no           | ND          | ND         |
| CED-4  | 1                     | H   | 9      | 241                  | GAG     | AAG                          | 81   | Glu  | Lys  | -                | -     | ++      | yes          | 1           | SAC        |
| CED-4  | 1                     | H   | 10     | 413                  | CTG     | CCG                          | 138  | Leu  | Pro  | +++              | +++   | ++      | no           | 1           | SAC        |
| CED-4  | 1                     | H   | 11     | ND                   | ND      | ND                           | ND   | ND   | ND   | -                | -     | -       | yes          | ND          | ND         |
| CED-4  | 1                     | H   | 12     | ND                   | ND      | ND                           | ND   | ND   | ND   | ++               | -     | -       | no           | ND          | ND         |
| CED-4  | 2                     | A   | 1      | 49                   | CGA     | TGA                          | 17   | Arg  | STOP | -                | -     | -       | yes          | 1           | nonsense   |
| CED-4  | 2                     | A   | 2      | 608                  | TCG     | TTG                          | 203  | Ser  | Leu  | -                | -     | ++      | yes          | 1           | SAC        |
| CED-4  | 2                     | A   | 3      | ND                   | ND      | ND                           | ND   | ND   | ND   | -                | -     | -       | yes          | ND          | ND         |
| CED-4  | 2                     | A   | 4      | ND                   | ND      | ND                           | ND   | ND   | ND   | ++               | +++   | ++      | no           | ND          | ND         |
| CED-4  | 2                     | A   | 5      | ND                   | ND      | ND                           | ND   | ND   | ND   | -                | -     | -       | yes          | ND          | ND         |
| CED-4  | 2                     | A   | 6      | ND                   | ND      | ND                           | ND   | ND   | ND   | ++               | +++   | ++      | no           | ND          | ND         |
| CED-4  | 2                     | A   | 7      | 219                  | TGG     | TGA                          | 73   | Trp  | STOP | -                | -     | -       | yes          | 1           | nonsense   |
| CED-4  | 2                     | A   | 8      | 619                  | AAA     |                              |      |      |      |                  |       |         |              |             |            |



| Screen | Location in the plate |     |        | Sequence information |                              |         |      |      |      | Interaction with |       |         | F-Y2H Retest | Mutation(s) |            |
|--------|-----------------------|-----|--------|----------------------|------------------------------|---------|------|------|------|------------------|-------|---------|--------------|-------------|------------|
|        | Plate                 | Row | Column | nucleotide #         | codon-1                      | codon-2 | AA # | AA-1 | AA-2 | CED-4            | SPD-5 | F25F8.1 |              | Number      | Type       |
| CED-4  | 2                     | A   | 12     | 233                  | CTT                          | CCT     | 78   | Leu  | Pro  | -                | -     | ++      | yes          | 1           | SAC        |
| CED-4  | 2                     | B   | 1      | 335                  | GAG                          | GGG     | 112  | Glu  | Gly  | -                | -     | -       | yes          | 1           | SAC        |
| CED-4  | 2                     | B   | 2      | 611                  | CTG                          | CCG     | 204  | Leu  | Pro  | -                | -     | -       | yes          | 1           | SAC        |
| CED-4  | 2                     | B   | 3      | 49                   | CGA                          | TGA     | 17   | Arg  | STOP | -                | -     | -       | yes          | 1           | nonsense   |
| CED-4  | 2                     | B   | 4      | 526                  | TCG                          | CCG     | 176  | Ser  | Pro  | -                | -     | -       | yes          | 1           | SAC        |
| CED-4  | 2                     | B   | 5      | 317                  | CCG                          | CTG     | 106  | Pro  | Leu  | -                | +++   | ++      | yes          | 1           | SAC        |
| CED-4  | 2                     | B   | 6      | 508                  | CGT                          | TGT     | 170  | Arg  | Cys  | ++               | +     | +       | no           | 1           | SAC        |
| CED-4  | 2                     | B   | 7      | 436                  | TTT                          | CTT     | 146  | Phe  | Leu  | -                | -     | +       | yes          | 1           | SAC        |
| CED-4  | 2                     | B   | 8      | 1st-233              | CTT                          | CCT     | 78   | Leu  | Pro  | -                | -     | -       | yes          | 2           | missense   |
| CED-4  | 2                     | B   | 8      | 2nd-248              | TTT                          | TCT     | 83   | Phe  | Ser  | -                | -     | -       | yes          | 2           | missense   |
| CED-4  | 2                     | B   | 9      | 445                  | TAT                          | CAT     | 149  | Tyr  | His  | -                | -     | -       | yes          | 1           | SAC        |
| CED-4  | 2                     | B   | 10     | 52                   | CGA                          | TGA     | 18   | Arg  | STOP | -                | -     | -       | yes          | 1           | nonsense   |
| CED-4  | 2                     | B   | 11     | 242                  | GAG                          | GGG     | 81   | Glu  | Gly  | -                | -     | +++     | yes          | 1           | SAC        |
| CED-4  | 2                     | B   | 12     | 308                  | CCG                          | CAG     | 103  | Pro  | Gln  | -                | -     | ++      | yes          | 1           | SAC        |
| CED-4  | 2                     | C   | 1      | 467                  | GTT                          | GCT     | 156  | Val  | Ala  | -                | -     | +       | yes          | 1           | SAC        |
| CED-4  | 2                     | C   | 2      | 236                  | GAT                          | GGT     | 79   | Asp  | Gly  | -                | +++   | +++     | yes          | 1           | SAC        |
| CED-4  | 2                     | C   | 3      | 427                  | AGA                          | GGA     | 143  | Arg  | Gly  | -                | +++   | +       | yes          | 1           | SAC        |
| CED-4  | 2                     | C   | 4      | 509                  | CGT                          | TGT     | 170  | Arg  | Cys  | ++               | +     | +       | no           | 1           | SAC        |
| CED-4  | 2                     | C   | 5      | ND                   | ND                           | ND      | ND   | ND   | ND   | -                | -     | -       | yes          | 1           | ND         |
| CED-4  | 2                     | C   | 6      | 593                  | CTC                          | CCC     | 198  | Leu  | Pro  | -                | -     | -       | yes          | 1           | SAC        |
| CED-4  | 2                     | C   | 7      | 413                  | CTG                          | CCG     | 138  | Leu  | Pro  | -                | -     | -       | yes          | 1           | SAC        |
| CED-4  | 2                     | C   | 8      | 436                  | TTT                          | CTT     | 146  | Phe  | Leu  | -                | -     | +       | yes          | 1           | SAC        |
| CED-4  | 2                     | C   | 9      | ND                   | ND                           | ND      | ND   | ND   | ND   | -                | -     | -       | yes          | 1           | ND         |
| CED-4  | 2                     | C   | 10     | 541                  | GTA                          | ATA     | 181  | Val  | Ile  | +++              | ++    | ++      | no           | 1           | SAC        |
| CED-4  | 2                     | C   | 11     | 359                  | GGA                          | GAA     | 120  | Gly  | Glu  | -                | -     | -       | yes          | 1           | SAC        |
| CED-4  | 2                     | C   | 12     | WT                   | WT                           | WT      | WT   | WT   | WT   | -                | -     | -       | yes          | 0           | WT         |
| CED-4  | 2                     | D   | 1      | 136                  | CAG                          | TAG     | 46   | Gln  | STOP | -                | -     | -       | yes          | 1           | nonsense   |
| CED-4  | 2                     | D   | 2      | 455                  | GTG                          | GAG     | 152  | Val  | Glu  | -                | -     | -       | yes          | 1           | SAC        |
| CED-4  | 2                     | D   | 3      | ND                   | ND                           | ND      | ND   | ND   | ND   | -                | -     | -       | yes          | 1           | ND         |
| CED-4  | 2                     | D   | 4      | 114                  | 1 bp deletion ==> frameshift |         |      |      |      | -                | -     | -       | yes          | 1           | frameshift |
| CED-4  | 2                     | D   | 5      | 329                  | CAA                          | CAA     | 110  | Gln  | Pro  | -                | -     | +       | yes          | 1           | SAC        |
| CED-4  | 2                     | D   | 6      | 335                  | GAG                          | GGG     | 112  | Glu  | Gly  | -                | -     | -       | yes          | 1           | SAC        |
| CED-4  | 2                     | D   | 7      | ND                   | ND                           | ND      | ND   | ND   | ND   | -                | +++   | -       | yes          | 1           | ND         |
| CED-4  | 2                     | D   | 8      | 589                  | AAC                          | GAC     | 197  | Asn  | Asp  | -                | -     | +++     | no           | 1           | SAC        |
| CED-4  | 2                     | D   | 9      | WT                   | WT                           | WT      | WT   | WT   | WT   | +++              | +++   | +++     | yes          | 0           | WT         |
| CED-4  | 2                     | D   | 10     | 314                  | TTG                          | TCG     | 105  | Leu  | Ser  | -                | +++   | ++      | yes          | 1           | SAC        |
| CED-4  | 2                     | D   | 11     | 593                  | CTC                          | CCC     | 198  | Leu  | Pro  | -                | -     | -       | yes          | 1           | SAC        |
| CED-4  | 2                     | D   | 12     | 316                  | CCG                          | CTG     | 106  | Pro  | Leu  | -                | ++    | +++     | yes          | 1           | SAC        |
| CED-4  | 2                     | E   | 1      | 52                   | CGA                          | TGA     | 18   | Arg  | STOP | -                | -     | -       | yes          | 1           | nonsense   |
| CED-4  | 2                     | E   | 2      | 604                  | ACA                          | CCA     | 202  | Thr  | Pro  | -                | -     | -       | yes          | 1           | SAC        |
| CED-4  | 2                     | E   | 3      | 219                  | TGG                          | TGA     | 73   | Trp  | STOP | -                | -     | -       | yes          | 1           | nonsense   |
| CED-4  | 2                     | E   | 4      | 236                  | GAT                          | GCT     | 79   | Asp  | Ala  | -                | ++    | +++     | yes          | 1           | SAC        |
| CED-4  | 2                     | E   | 5      | 526                  | TCG                          | CCG     | 176  | Ser  | Pro  | -                | -     | -       | yes          | 1           | SAC        |
| CED-4  | 2                     | E   | 6      | 619                  | AAA                          | GAA     | 207  | Lys  | Glu  | -                | +++   | +++     | yes          | 1           | SAC        |
| CED-4  | 2                     | E   | 7      | ND                   | ND                           | ND      | ND   | ND   | ND   | -                | -     | -       | yes          | 1           | ND         |
| CED-4  | 2                     | E   | 8      | 526                  | TCG                          | CCA     | 176  | Ser  | Pro  | -                | -     | -       | yes          | 1           | SAC        |
| CED-4  | 2                     | E   | 9      | 1st-248              | TTT                          | TCT     | 83   | Phe  | Ser  | -                | -     | -       | yes          | 2           | missense   |
| CED-4  | 2                     | E   | 9      | 2nd-485              | GAT                          | GGT     | 162  | Asp  | Gly  | -                | -     | -       | yes          | 2           | missense   |
| CED-4  | 2                     | E   | 10     | 335                  | GAG                          | GGG     | 112  | Glu  | Gly  | -                | -     | -       | yes          | 1           | SAC        |
| CED-4  | 2                     | E   | 11     | WT                   | WT                           | WT      | WT   | WT   | WT   | +++              | +++   | ++      | no           | 0           | WT         |
| CED-4  | 2                     | E   | 12     | 318                  | CCG                          | CCG     | 106  | Pro  | Arg  | -                | -     | -       | yes          | 1           | SAC        |
| CED-4  | 2                     | F   | 1      | 49                   | CGA                          | TGA     | 17   | Arg  | STOP | -                | -     | -       | yes          | 1           | nonsense   |
| CED-4  | 2                     | F   | 2      | 574                  | CAG                          | TAG     | 192  | Gln  | STOP | -                | -     | -       | yes          | 1           | nonsense   |
| CED-4  | 2                     | F   | 3      | 1st-131              | GAT                          | GGT     | 44   | Asp  | Gly  | -                | -     | +       | yes          | 2           | missense   |
| CED-4  | 2                     | F   | 3      | 2nd-248              | TTT                          | TCT     | 83   | Phe  | Ser  | -                | -     | +       | yes          | 2           | missense   |
| CED-4  | 2                     | F   | 4      | 136                  | CAG                          | TAG     | 46   | Gln  | STOP | -                | -     | -       | yes          | 1           | nonsense   |
| CED-4  | 2                     | F   | 5      | 604                  | ACA                          | GCA     | 202  | Thr  | Ala  | ++               | -     | -       | no           | 1           | SAC        |
| CED-4  | 2                     | F   | 6      | 521                  | CTA                          | CCA     | 174  | Leu  | Pro  | -                | -     | -       | yes          | 1           | SAC        |
| CED-4  | 2                     | F   | 7      | 604                  | ACA                          | GCA     | 202  | Thr  | Ala  | ++               | +     | -       | no           | 1           | SAC        |
| CED-4  | 2                     | F   | 8      | 251                  | GTG                          | GAG     | 84   | Val  | Glu  | -                | -     | -       | yes          | 1           | SAC        |
| CED-4  | 2                     | F   | 9      | 1st-190              | GAG                          | AAG     | 64   | Glu  | Lys  | -                | -     | +       | yes          | 2           | missense   |
| CED-4  | 2                     | F   | 9      | 2nd-642              | TGG                          | TGA     | 214  | Trp  | STOP | -                | -     | +       | yes          | 2           | nonsense   |
| CED-4  | 2                     | F   | 10     | ND                   | ND                           | ND      | ND   | ND   | ND   | -                | -     | -       | yes          | 1           | ND         |
| CED-4  | 2                     | F   | 11     | ND                   | ND                           | ND      | ND   | ND   | ND   | -                | -     | -       | yes          | 1           | ND         |
| CED-4  | 2                     | F   | 12     | 49                   | CGA                          | TGA     | 17   | Arg  | STOP | -                | -     | -       | yes          | 1           | nonsense   |
| CED-4  | 2                     | G   | 1      | 263                  | TTC                          | TCC     | 88   | Phe  | Ser  | -                | -     | -       | yes          | 1           | SAC        |
| CED-4  | 2                     | G   | 2      | 187                  | GGA                          | TGA     | 63   | Gly  | STOP | -                | -     | -       | yes          | 1           | nonsense   |
| CED-4  | 2                     | G   | 3      | 263                  | TTC                          | TCC     | 88   | Phe  | Ser  | -                | -     | -       | yes          | 1           | SAC        |
| CED-4  | 2                     | G   | 4      | 691                  | ATG                          | GTG     | 231  | Met  | Val  | +++              | +++   | +++     | no           | 1           | SAC        |
| CED-4  | 2                     | G   | 5      | WT                   | WT                           | WT      | WT   | WT   | WT   | +++              | +++   | +++     | no           | 0           | WT         |
| CED-4  | 2                     | G   | 6      | 1st-449              | CAG                          | CGG     | 150  | Gln  | Arg  | -                | +     | +       | yes          | 2           | missense   |
| CED-4  | 2                     | G   | 6      | 2nd-642              | TGG                          | TGA     | 214  | Trp  | STOP | -                | +     | +       | yes          | 2           | nonsense   |
| CED-4  | 2                     | G   | 7      | 265                  | ACG                          | CCG     | 69   | Thr  | Pro  | -                | -     | -       | yes          | 1           | SAC        |
| CED-4  | 2                     | G   | 7      | WT                   | WT                           | WT      | WT   | WT   | WT   | ++               | +++   | +++     | no           | 0           | WT         |
| CED-4  | 2                     | G   | 9      | 242                  | GAG                          | GGG     | 81   | Glu  | Gly  | -                | +     | +++     | yes          | 1           | SAC        |
| CED-4  | 2                     | G   | 10     | 445                  | TAT                          | CAT     | 149  | Tyr  | His  | -                | -     | -       | yes          | 1           | SAC        |
| CED-4  | 2                     | G   | 11     | 611                  | CTG                          | CCG     | 204  | Leu  | Pro  | -                | -     | -       | yes          | 1           | SAC        |
| CED-4  | 2                     | G   | 12     | 526                  | CCG                          | TCG     | 176  | Pro  | Ser  | -                | -     | -       | yes          | 1           | SAC        |
| CED-4  | 2                     | H   | 1      | 52                   | CGA                          | TGA     | 18   | Arg  | STOP | -                | -     | -       | yes          | 1           | nonsense   |
| CED-4  | 2                     | H   | 2      | ND                   | ND                           | ND      | ND   | ND   | ND   | -                | -     | ++      | yes          | 1           | ND         |
| CED-4  | 2                     | H   | 3      | 143                  | 1 bp deletion ==> frameshift |         |      |      |      | -                | -     | -       | yes          | 1           | frameshift |
| CED-4  | 2                     | H   | 4      | 1st-298              | TTT                          | CTT     | 100  | Phe  | Leu  | -                | +++   | +++     | yes          | 2           | missense   |
| CED-4  | 2                     | H   | 4      | 2nd-656              | CGG                          | CAG     | 219  | Arg  | Gln  | -                | +++   | +++     | yes          | 2           | missense   |
| CED-4  | 2                     | H   | 5      | 575                  | 1 bp deletion ==> frameshift |         |      |      |      | -                | -     | -       | yes          | 1           | frameshift |
| CED-4  | 2                     | H   | 6      | 247                  | TTT                          | CTT     | 83   | Phe  | Leu  | -                | -     | ++      | yes          | 1           | SAC        |
| CED-4  | 2                     | H   | 7      | 516                  | ATA                          | ATC     | 172  | Ile  | Ile  | +++              | +++   | +++     | no           | 1           | synonymous |
| CED-4  | 2                     | H   | 8      | 416                  | CTC                          | CCC     | 139  | Leu  | Pro  | -                | -     | -       | yes          | 1           | SAC        |
| CED-4  | 2                     | H   | 9      | 664                  | 1 bp deletion ==> frameshift |         |      |      |      | -                | -     | +       | yes          | 1           | frameshift |
| CED-4  | 2                     | H   | 10     | 338                  | CAC                          | CCC     | 113  | His  | Arg  | -                | -     | -       | yes          | 1           | SAC        |
| CED-4  | 2                     | H   | 11     | 156                  | 1 bp deletion ==> frameshift |         |      |      |      | -                | -     | -       | yes          | 1           | frameshift |
| CED-4  | 2                     | H   | 12     | ND                   | ND                           | ND      | ND   | ND   | ND   | ++               | -     | -       | no           | 1           | ND         |

**Supplementary Table 2** | Alleles identified in the R-Y2H selection screen against CED-4. Position in the plates shown in Supplementary Figure 3, sequence information, and interaction scores with CED-4, SPD-5 or F25F8.1 are indicated. Nucleotide #: position of the mutation. Codon-1: wild-type codon. Codon-2: mutant codon. AA #: amino acid position. AA-1: wild-type amino acid. AA-2: mutant amino acid. Grey lines: alleles with multiple mutations (numbered 1st, 2nd, 3rd). ND: No Data. WT: wild-type. F-Y2H retest: confirmation of the loss of interaction with CED-4 by F-Y2H. Nonsense: nonsense mutation. Missense: missense mutation. Frameshift: frameshift due to an out-of-frame insertion or deletion. Synonymous: synonymous mutation. SAC: single amino acid change.

# Supplementary Table 3

| Screen | Location in the plate |     |        | Sequence information |         |         |      |      |      |       | Interaction with |         |        | F-Y2H Rereset | Mutation(s) |  |
|--------|-----------------------|-----|--------|----------------------|---------|---------|------|------|------|-------|------------------|---------|--------|---------------|-------------|--|
|        | Plate                 | Row | Column | nucleotide #         | codon-1 | codon-2 | AA # | AA-1 | AA-2 | CED-4 | SPD-5            | F25F8.1 | Number |               | Type        |  |
| SPD-5  | 1                     | A   | 1      | 233                  | CTT     | CCT     | 78   | Leu  | Pro  | -     | -                | ++      | yes    | 1             | SAC         |  |
| SPD-5  | 1                     | A   | 2      | 247                  | TTT     | CTT     | 83   | Phe  | Leu  | -     | -                | +++     | yes    | 1             | SAC         |  |
| SPD-5  | 1                     | A   | 3      | 1st-123              | AAT     | GAT     | 41   | Asn  | Asp  | -     | -                | +       | yes    | 2             | missense    |  |
| SPD-5  | 1                     | A   | 3      | 2nd-334              | AAG     | AAG     | 112  | Glu  | Lys  | -     | -                | +       | yes    | 2             | missense    |  |
| SPD-5  | 1                     | A   | 4      | 87                   |         |         |      |      |      | -     | -                | -       | yes    | 1             | frameshift  |  |
| SPD-5  | 1                     | A   | 5      | 1st-231              | AGG     | AGC     | 77   | Arg  | Ser  | ++    | -                | +++     | yes    | 2             | SAC         |  |
| SPD-5  | 1                     | A   | 5      | 2nd-333              | CCG     | CCA     | 111  | Pro  | Pro  | ++    | -                | +++     | yes    | 2             | synonymous  |  |
| SPD-5  | 1                     | A   | 6      | 1st-152              | CCG     | CTG     | 51   | Pro  | Leu  | +     | -                | -       | yes    | 2             | missense    |  |
| SPD-5  | 1                     | A   | 6      | 2nd-680              | CTC     | CCC     | 227  | Leu  | Pro  | +     | -                | -       | yes    | 2             | missense    |  |
| SPD-5  | 1                     | A   | 7      |                      | ND      | ND      | ND   | ND   | ND   | +     | -                | +       | yes    | ND            | ND          |  |
| SPD-5  | 1                     | A   | 8      | 347                  | ATG     | AGG     | 116  | Met  | Arg  | -     | -                | -       | yes    | 1             | SAC         |  |
| SPD-5  | 1                     | A   | 9      | 640                  | TGG     | CGG     | 214  | Trp  | Arg  | ++    | -                | ++      | yes    | 1             | SAC         |  |
| SPD-5  | 1                     | A   | 10     | 329                  | CAA     | CGA     | 110  | Gln  | Arg  | +     | -                | ++      | yes    | 1             | SAC         |  |
| SPD-5  | 1                     | A   | 11     | ND                   | ND      | ND      | ND   | ND   | ND   | -     | -                | -       | yes    | ND            | ND          |  |
| SPD-5  | 1                     | A   | 12     | 204                  |         |         |      |      |      | -     | -                | -       | yes    | 1             | frameshift  |  |
| SPD-5  | 1                     | B   | 1      | 593                  | CTC     | CCC     | 198  | Leu  | Pro  | -     | -                | -       | yes    | 1             | SAC         |  |
| SPD-5  | 1                     | B   | 2      | 1st-245              | GGA     | GAA     | 82   | Gly  | Glu  | ++    | -                | ++      | yes    | 2             | SAC         |  |
| SPD-5  | 1                     | B   | 2      | 2nd-474              | AAT     | AAC     | 158  | Asn  | Asn  | ++    | -                | ++      | yes    | 2             | synonymous  |  |
| SPD-5  | 1                     | B   | 3      | 259                  | TAT     | AAT     | 87   | Tyr  | Asn  | -     | -                | -       | yes    | 1             | SAC         |  |
| SPD-5  | 1                     | B   | 4      | 659                  | AGC     | ATC     | 220  | Ser  | Ile  | ++    | -                | +++     | yes    | 1             | SAC         |  |
| SPD-5  | 1                     | B   | 5      | ND                   | ND      | ND      | ND   | ND   | ND   | -     | -                | -       | yes    | ND            | ND          |  |
| SPD-5  | 1                     | B   | 6      | 93                   |         |         |      |      |      | -     | -                | -       | yes    | 1             | frameshift  |  |
| SPD-5  | 1                     | B   | 7      | 1st-490              | TGT     | CGT     | 164  | Cys  | Arg  | -     | -                | -       | yes    | 2             | missense    |  |
| SPD-5  | 1                     | B   | 7      | 2nd-586              | CGA     | TGA     | 196  | Arg  | STOP | -     | -                | -       | yes    | 2             | nonsense    |  |
| SPD-5  | 1                     | B   | 8      | 443                  | CTG     | CCG     | 148  | Leu  | Pro  | -     | -                | -       | yes    | 1             | SAC         |  |
| SPD-5  | 1                     | B   | 9      | 1st-130              | GAT     | AAT     | 44   | Asp  | Asn  | -     | -                | -       | yes    | 2             | missense    |  |
| SPD-5  | 1                     | B   | 9      | 2nd-389              |         |         |      |      |      | -     | -                | -       | yes    | 2             | frameshift  |  |
| SPD-5  | 1                     | B   | 10     | 640                  | TGG     | CGG     | 214  | Trp  | Arg  | ++    | -                | ++      | yes    | 1             | SAC         |  |
| SPD-5  | 1                     | B   | 11     | 680                  | CTC     | CCC     | 227  | Leu  | Pro  | -     | -                | -       | yes    | 1             | SAC         |  |
| SPD-5  | 1                     | B   | 12     | 217                  | TGG     | CGG     | 73   | Trp  | Arg  | ++    | -                | +       | yes    | 1             | SAC         |  |
| SPD-5  | 1                     | C   | 1      | 502                  | TAT     | CAT     | 168  | Tyr  | His  | ++    | -                | ++      | yes    | 1             | SAC         |  |
| SPD-5  | 1                     | C   | 2      | 370                  | GAG     | AAG     | 124  | Glu  | Lys  | -     | -                | -       | yes    | 1             | SAC         |  |
| SPD-5  | 1                     | C   | 3      | 661                  | TGG     | CGG     | 221  | Trp  | Arg  | -     | -                | +       | yes    | 1             | SAC         |  |
| SPD-5  | 1                     | C   | 4      | 593                  | CTC     | CCC     | 198  | Leu  | Pro  | -     | -                | -       | yes    | 1             | SAC         |  |
| SPD-5  | 1                     | C   | 5      | 671                  | TTC     | TCC     | 224  | Phe  | Ser  | -     | -                | -       | yes    | 1             | SAC         |  |
| SPD-5  | 1                     | C   | 6      | WT                   | WT      | WT      | WT   | WT   | WT   | +++   | +++              | +++     | yes    | 0             | WT          |  |
| SPD-5  | 1                     | C   | 7      | 521                  | CTA     | CCA     | 174  | Leu  | Pro  | ++    | -                | -       | yes    | 1             | SAC         |  |
| SPD-5  | 1                     | C   | 8      | 439                  | TCA     | CCA     | 147  | Ser  | Pro  | +++   | -                | +++     | yes    | 1             | SAC         |  |
| SPD-5  | 1                     | C   | 9      | WT                   | WT      | WT      | WT   | WT   | WT   | +++   | +++              | +++     | yes    | 0             | WT          |  |
| SPD-5  | 1                     | C   | 10     | 1st-217              | TGG     | CGG     | 73   | Trp  | Arg  | ++    | -                | +++     | yes    | 2             | SAC         |  |
| SPD-5  | 1                     | C   | 10     | 2nd-534              | GGC     | GGT     | 178  | Gly  | Gly  | ++    | -                | +++     | yes    | 2             | synonymous  |  |
| SPD-5  | 1                     | C   | 11     | 515                  | ATA     | AGA     | 172  | Ile  | Arg  | +     | -                | -       | yes    | 1             | SAC         |  |
| SPD-5  | 1                     | C   | 12     | 335                  | GAG     | GGG     | 112  | Glu  | Gly  | -     | -                | -       | yes    | 1             | SAC         |  |
| SPD-5  | 1                     | D   | 1      | 433                  | TCA     | CCA     | 145  | Ser  | Pro  | ++    | -                | +++     | yes    | 1             | SAC         |  |
| SPD-5  | 1                     | D   | 2      | 229                  | AGG     | GGG     | 77   | Arg  | Gly  | +     | -                | ++      | yes    | 1             | SAC         |  |
| SPD-5  | 1                     | D   | 3      | 280                  | CAA     | TAA     | 94   | Gln  | STOP | +     | +                | ++      | no     | 1             | nonsense    |  |
| SPD-5  | 1                     | D   | 4      | 229                  | AGG     | GGG     | 77   | Arg  | Gly  | ++    | -                | ++      | yes    | 1             | SAC         |  |
| SPD-5  | 1                     | D   | 5      | ND                   | ND      | ND      | ND   | ND   | ND   | -     | -                | +++     | yes    | ND            | ND          |  |
| SPD-5  | 1                     | D   | 6      | ND                   | ND      | ND      | ND   | ND   | ND   | ++    | -                | +++     | yes    | ND            | ND          |  |
| SPD-5  | 1                     | D   | 7      | 553                  |         |         |      |      |      | -     | -                | -       | yes    | 1             | frameshift  |  |
| SPD-5  | 1                     | D   | 8      | 1st-682              | GGA     | AGA     | 228  | Gly  | Arg  | +     | -                | +       | yes    | 2             | missense    |  |
| SPD-5  | 1                     | D   | 8      | 2nd-703              | TAC     | CAC     | 235  | Tyr  | His  | +     | -                | +       | yes    | 2             | missense    |  |
| SPD-5  | 1                     | D   | 9      | ND                   | ND      | ND      | ND   | ND   | ND   | -     | -                | -       | yes    | ND            | ND          |  |
| SPD-5  | 1                     | D   | 10     | 658                  | AGC     | GGC     | 220  | Ser  | Gly  | ++    | -                | ++      | yes    | 1             | SAC         |  |
| SPD-5  | 1                     | E   | 1      | ND                   | ND      | ND      | ND   | ND   | ND   | ++    | -                | ++      | yes    | ND            | ND          |  |
| SPD-5  | 1                     | E   | 2      | ND                   | ND      | ND      | ND   | ND   | ND   | -     | -                | ++      | yes    | ND            | ND          |  |
| SPD-5  | 1                     | E   | 1      | ND                   | ND      | ND      | ND   | ND   | ND   | -     | -                | +       | yes    | ND            | ND          |  |
| SPD-5  | 2                     | A   | 1      | 1st-548              | GCA     | GTA     | 183  | Ala  | Val  | -     | -                | -       | yes    | 2             | missense    |  |
| SPD-5  | 2                     | A   | 2      | 2nd-607              | TGG     | CCG     | 203  | Ser  | Pro  | -     | -                | -       | yes    | 2             | missense    |  |
| SPD-5  | 2                     | A   | 3      | ND                   | ND      | ND      | ND   | ND   | ND   | -     | -                | -       | yes    | ND            | ND          |  |
| SPD-5  | 2                     | A   | 4      | ND                   | ND      | ND      | ND   | ND   | ND   | -     | -                | -       | yes    | ND            | ND          |  |
| SPD-5  | 2                     | A   | 5      | ND                   | ND      | ND      | ND   | ND   | ND   | -     | -                | -       | yes    | ND            | ND          |  |
| SPD-5  | 2                     | A   | 6      | ND                   | ND      | ND      | ND   | ND   | ND   | -     | -                | -       | yes    | ND            | ND          |  |
| SPD-5  | 2                     | A   | 7      | 521                  | CTA     | CCA     | 174  | Leu  | Pro  | ++    | -                | -       | yes    | 1             | SAC         |  |
| SPD-5  | 2                     | A   | 8      | 1st-400              | TTC     | CTC     | 134  | Phe  | Leu  | +     | -                | -       | yes    | 2             | missense    |  |
| SPD-5  | 2                     | A   | 8      | 2nd-611              | CGT     | CGG     | 204  | Leu  | Pro  | +     | -                | -       | yes    | 2             | missense    |  |
| SPD-5  | 2                     | A   | 9      | 433                  | TCA     | CCA     | 145  | Ser  | Pro  | ++    | -                | +++     | yes    | 1             | SAC         |  |
| SPD-5  | 2                     | A   | 10     | 143                  | TTG     | TAG     | 48   | Leu  | STOP | -     | -                | -       | yes    | 1             | nonsense    |  |
| SPD-5  | 2                     | A   | 11     | WT                   | WT      | WT      | WT   | WT   | WT   | +++   | +++              | +++     | no     | 0             | WT          |  |
| SPD-5  | 2                     | A   | 12     | 661                  | TGG     | CGG     | 221  | Trp  | Arg  | -     | -                | +       | yes    | 1             | SAC         |  |
| SPD-5  | 2                     | B   | 1      | 526                  | TGC     | CCG     | 176  | Ser  | Pro  | -     | -                | -       | yes    | 1             | SAC         |  |
| SPD-5  | 2                     | B   | 2      | 1st-613              | TTC     | CTC     | 205  | Phe  | Leu  | -     | -                | -       | yes    | 2             | missense    |  |
| SPD-5  | 2                     | B   | 2      | 2nd-683              | GGA     | AAA     | 228  | Gly  | Lys  | -     | -                | -       | yes    | 2             | missense    |  |
| SPD-5  | 2                     | B   | 3      | 338                  | CAC     | CGC     | 113  | His  | Arg  | -     | -                | -       | yes    | 1             | SAC         |  |
| SPD-5  | 2                     | B   | 4      | 335                  | GAG     | GGG     | 112  | Glu  | Gly  | -     | -                | -       | yes    | 1             | SAC         |  |
| SPD-5  | 2                     | B   | 5      | 1st-13               | ACG     | GGG     | 5    | Thr  | Ala  | -     | -                | -       | yes    | 3             | missense    |  |
| SPD-5  | 2                     | B   | 5      | 2nd-499              | TCT     | CCT     | 167  | Ser  | Pro  | -     | -                | -       | yes    | 3             | missense    |  |
| SPD-5  | 2                     | B   | 5      | 3rd-526              | TGC     | CCG     | 176  | Ser  | Pro  | -     | -                | -       | yes    | 3             | missense    |  |
| SPD-5  | 2                     | B   | 6      | 143                  | TTG     | TAG     | 48   | Leu  | STOP | -     | -                | -       | yes    | 1             | nonsense    |  |
| SPD-5  | 2                     | B   | 7      | 329                  | CAA     | CGA     | 110  | Gln  | Arg  | +     | -                | +       | yes    | 1             | SAC         |  |
| SPD-5  | 2                     | B   | 8      | 1st-631              | CGG     | CTG     | 211  | Arg  | Leu  | -     | -                | +       | yes    | 2             | missense    |  |
| SPD-5  | 2                     | B   | 8      | 2nd-650              | CAC     | CGC     | 217  | His  | Arg  | -     | -                | +       | yes    | 2             | missense    |  |
| SPD-5  | 2                     | B   | 9      | 1st-450              | CAG     | CAA     | 150  | Gln  | Gln  | -     | -                | -       | yes    | 2             | synonymous  |  |
| SPD-5  | 2                     | B   | 9      | 2nd-593              | CTC     | CCC     | 198  | Leu  | Pro  | -     | -                | -       | yes    | 2             | SAC         |  |
| SPD-5  | 2                     | B   | 10     | 661                  | TGG     | CGG     | 221  | Trp  | Arg  | -     | -                | -       | yes    | 1             | SAC         |  |
| SPD-5  | 2                     | B   | 11     | 1st-682              | GGA     | AGA     | 228  | Gly  | Arg  | +     | -                | -       | yes    | 2             | missense    |  |
| SPD-5  | 2                     | B   | 11     | 2nd-703              | TAC     | CAC     | 235  | Tyr  | His  | +     | -                | -       | yes    | 2             | missense    |  |
| SPD-5  | 2                     | B   | 12     | 248                  | TTT     | TCT     | 83   | Phe  | Ser  | -     | -                | +       | yes    | 1             | SAC         |  |
| SPD-5  | 2                     | C   | 1      | WT                   | WT      | WT      | WT   | WT   | WT   | +++   | +++              | +++     | no     | 0             | WT          |  |
| SPD-5  | 2                     | C   | 2      | 527                  | TGC     | TTG     | 176  | Ser  | Leu  | -     | -                | -       | yes    | 1             | SAC         |  |
| SPD-5  | 2                     | C   | 3      | 446                  | TAT     | TGT     | 149  | Tyr  | Cys  | -     | -                | -       | yes    | 1             | SAC         |  |
| SPD-5  | 2                     | C   | 4      | 671                  | TTC     | TCC     | 224  | Phe  | Ser  | -     | -                | -       | yes    | 1             | SAC         |  |
| SPD-5  | 2                     | C   | 5      | 680                  | CTC     | CCC     | 227  | Leu  | Pro  | -     | -                | -       | yes    | 1             | SAC         |  |
| SPD-5  | 2                     | C   | 6      | 433                  | TCA     | CCA     | 145  | Ser  | Pro  | ++    | -                | +++     | yes    | 1             | SAC         |  |
| SPD-5  | 2                     | C   | 7      | 172                  | CGA     | TGA     | 58   | Arg  | STOP | -     | -                | -       | yes    | 1             | nonsense    |  |
| SPD-5  | 2                     | C   | 8      | 607                  | TGC     | CCG     | 203  | Ser  | Pro  | -     | -                | -       | yes    | 1             | SAC         |  |
| SPD-5  | 2                     | C   | 9      | ND                   | ND      | ND      | ND   | ND   | ND   | +++   | +++              | +++     | no     | ND            | ND          |  |
| SPD-5  | 2                     | C   | 10     | 274                  | ATC     | GTC     | 92   | Ile  | Val  | +++   | +++              | ++      | yes    | 1             | SAC         |  |
| SPD-5  | 2                     | C   | 11     | 611                  | CTG     | CCG     | 204  | Leu  | Pro  | -     | -                | -       | yes    | 1             | SAC         |  |
| SPD-5  | 2                     | C   | 12     | 611                  | CTG     | CCG     | 204  | Leu  | Pro  | -     | -                | -       | yes    | 1             | SAC         |  |
| SPD-5  | 2                     | D   | 1      | ND                   | ND      | ND      | ND   | ND   | ND   | ++    | -                | +++     | yes    | ND            | ND          |  |
| SPD-5  | 2                     | D   | 2      | WT                   | WT      | WT      | WT   | WT   | WT   | +++   | +++              | +++     | no     | 0             | WT          |  |
| SPD-5  | 2                     | D   | 3      | 335                  | GAG     | GGG     | 112  | Glu  | Gly  | -     | -                | -       | yes    | 1             | SAC         |  |
| SPD-5  | 2                     | D   | 4      | 521                  | CTA     | CCA     | 174  | Leu  | Pro  | ++    | -                | -       | yes    | 1             | SAC         |  |
| SPD-5  | 2                     | D   | 5      | 248                  | TTT     | TCT     | 83   | Phe  | Ser  | -     | -                | -       | yes    | 1             | SAC         |  |
| SPD-5  | 2                     | D   | 6      | 662                  | TGG     | TAG     | 221  | Trp  | STOP | -     | -                | -       | yes    | 1             | nonsense    |  |
| SPD-5  | 2                     | D   | 7      | ND                   | ND      | ND      | ND   | ND   | ND   | -     | -                | -       | yes    | ND            | ND          |  |
| SPD-5  | 2                     | D   | 8      | 1st-25               | TGC     | GCG     | 9    | Ser  | Ala  | ++    | -                | +++     | yes    | 2             | missense    |  |
| SPD-5  | 2                     | D   | 8      | 2nd-599              | GTT     | GCT     | 200  | Val  | Ala  | ++    | -                | +++     | yes    | 2             | missense    |  |
| SPD-5  | 2                     | D   | 9      | 1st-640              | TGG     | CGG     | 214  | Trp  | Arg  | +     | -                | ++      | yes    | 2             | SAC         |  |
| SPD-5  | 2                     | D   | 9      | 2nd-717              | GAA     | GAG     | 239  | Glu  | Glu  | +     | -                | ++      | yes    | 2             | synonymous  |  |
| SPD-5  | 2                     | D   | 10     | 247                  | TTT     | CTT     | 63   | Phe  | Leu  | -     | -                | ++      | yes    | 2             | SAC         |  |
| SPD-5  | 2                     | D   | 11     | 1st-601              | TAC     | CAC     | 201  | Tyr  | His  | -     | -                | +       | yes    | 2             | SAC         |  |
| SPD-5  | 2                     | D   | 11     | 2nd-732              | GGA     | GGG     | 244  | Gly  | Gly  | -     | -                | +       | yes    | 2             | synonymous  |  |
| SPD-5  | 2                     | D   | 12     | 335                  | GAG     |         |      |      |      |       |                  |         |        |               |             |  |

| Screen | Location in the plate |     |        | Sequence information |         |         |      |      |      |       | Interaction with |         |        | F-Y2H Retest | Mutation(s) |  |
|--------|-----------------------|-----|--------|----------------------|---------|---------|------|------|------|-------|------------------|---------|--------|--------------|-------------|--|
|        | Plate                 | Row | Column | nucleotide #         | codon-1 | codon-2 | AA # | AA-1 | AA-2 | CED-4 | SPD-5            | F25F8.1 | Number |              | Type        |  |
| SPD-5  | 2                     | E   | 3      | 1st-69               | GGC     | GGT     | 23   | Gly  | Gly  | -     | -                | -       | yes    | 2            | synonymous  |  |
| SPD-5  | 2                     | E   | 3      | 2nd-76               | AAG     | TAG     | 26   | Lys  | STOP | -     | -                | -       | yes    | 2            | nonsense    |  |
| SPD-5  | 2                     | E   | 4      | 536                  | GGT     | ATT     | 179  | Gly  | Ile  | -     | -                | -       | yes    | 1            | SAC         |  |
| SPD-5  | 2                     | E   | 5      | ND                   | ND      | ND      | ND   | ND   | ND   | -     | -                | -       | yes    | ND           | ND          |  |
| SPD-5  | 2                     | E   | 6      | 1st-415              | CTC     | TTC     | 139  | Leu  | Phe  | -     | -                | -       | yes    | 2            | missense    |  |
| SPD-5  | 2                     | E   | 6      | 2nd-593              | CTC     | CCC     | 198  | Leu  | Pro  | -     | -                | -       | yes    | 2            | missense    |  |
| SPD-5  | 2                     | E   | 7      | WT                   | WT      | WT      | WT   | WT   | WT   | +++   | +++              | +++     | no     | 0            | WT          |  |
| SPD-5  | 2                     | E   | 8      | 205                  | AAA     | TAA     | 69   | Lys  | STOP | -     | -                | -       | yes    | 1            | nonsense    |  |
| SPD-5  | 2                     | E   | 9      | ND                   | ND      | ND      | ND   | ND   | ND   | -     | -                | -       | yes    | ND           | ND          |  |
| SPD-5  | 2                     | E   | 10     | 478                  | CAG     | TAG     | 160  | Gln  | STOP | -     | -                | -       | yes    | 1            | nonsense    |  |
| SPD-5  | 2                     | E   | 11     | 233                  | CTT     | CCT     | 78   | Leu  | Pro  | -     | -                | +       | yes    | 1            | SAC         |  |
| SPD-5  | 2                     | E   | 12     | 335                  | GAG     | GGG     | 112  | Glu  | Gly  | -     | -                | -       | yes    | 1            | SAC         |  |
| SPD-5  | 2                     | F   | 1      | 593                  | CTC     | CCC     | 198  | Leu  | Pro  | -     | -                | -       | yes    | 1            | SAC         |  |
| SPD-5  | 2                     | F   | 2      | ND                   | ND      | ND      | ND   | ND   | ND   | -     | -                | -       | yes    | ND           | ND          |  |
| SPD-5  | 2                     | F   | 3      | 443                  | CTG     | CCG     | 148  | Leu  | Pro  | -     | -                | -       | yes    | 1            | SAC         |  |
| SPD-5  | 2                     | F   | 4      | 611                  | CTG     | CCG     | 204  | Leu  | Pro  | -     | -                | -       | yes    | 1            | SAC         |  |
| SPD-5  | 2                     | F   | 5      | 217                  | TGG     | CGG     | 73   | Trp  | Arg  | ++    | -                | +++     | yes    | 1            | SAC         |  |
| SPD-5  | 2                     | F   | 6      | 433                  | TCA     | CCA     | 145  | Ser  | Pro  | +     | -                | +++     | yes    | 1            | SAC         |  |
| SPD-5  | 2                     | F   | 7      | 1st-560              | GAA     | GGA     | 187  | Glu  | Gly  | -     | -                | -       | yes    | 2            | missense    |  |
| SPD-5  | 2                     | F   | 7      | 2nd-580              | GAA     | TAA     | 194  | Gln  | STOP | -     | -                | -       | yes    | 2            | nonsense    |  |
| SPD-5  | 2                     | F   | 8      | 611                  | CTG     | CCG     | 204  | Leu  | Pro  | -     | -                | -       | yes    | 1            | SAC         |  |
| SPD-5  | 2                     | F   | 9      | 1st-138              | CAA     | CAG     | 46   | Gln  | Gln  | -     | -                | -       | yes    | 2            | synonymous  |  |
| SPD-5  | 2                     | F   | 9      | 2nd-611              | CTG     | CCG     | 204  | Leu  | Pro  | -     | -                | -       | yes    | 2            | SAC         |  |
| SPD-5  | 2                     | F   | 10     | ND                   | ND      | ND      | ND   | ND   | ND   | -     | -                | -       | yes    | ND           | ND          |  |
| SPD-5  | 2                     | F   | 11     | ND                   | ND      | ND      | ND   | ND   | ND   | -     | -                | -       | yes    | ND           | ND          |  |
| SPD-5  | 2                     | F   | 12     | 593                  | CTC     | CCC     | 198  | Leu  | Pro  | -     | -                | -       | yes    | 1            | SAC         |  |
| SPD-5  | 2                     | G   | 1      | 295                  | TGG     | CGG     | 99   | Trp  | Arg  | -     | -                | -       | yes    | 1            | SAC         |  |
| SPD-5  | 2                     | G   | 2      | 1st-131              | GAT     | GGT     | 44   | Asp  | Gly  | -     | -                | ++      | yes    | 2            | missense    |  |
| SPD-5  | 2                     | G   | 2      | 2nd-247              | TTT     | CTT     | 83   | Phe  | Leu  | -     | -                | ++      | yes    | 2            | missense    |  |
| SPD-5  | 2                     | G   | 3      | 1st-433              | TCA     | CCA     | 145  | Ser  | Pro  | -     | -                | ++      | yes    | 2            | missense    |  |
| SPD-5  | 2                     | G   | 3      | 2nd-629              | ATC     | ACC     | 210  | Ile  | Thr  | -     | -                | ++      | yes    | 2            | missense    |  |
| SPD-5  | 2                     | G   | 4      | 1st-314              | TTG     | TCG     | 105  | Leu  | Ser  | -     | -                | -       | yes    | 3            | missense    |  |
| SPD-5  | 2                     | G   | 4      | 2nd-416              | CTC     | CCC     | 139  | Leu  | Pro  | -     | -                | -       | yes    | 3            | missense    |  |
| SPD-5  | 2                     | G   | 4      | 3rd-880              | CTC     | CCC     | 227  | Leu  | Pro  | -     | -                | -       | yes    | 3            | missense    |  |
| SPD-5  | 2                     | G   | 5      | 335                  | GAG     | GGG     | 112  | Glu  | Gly  | -     | -                | -       | yes    | 1            | SAC         |  |
| SPD-5  | 2                     | G   | 6      | 335                  | GAG     | GGG     | 112  | Glu  | Gly  | -     | -                | -       | yes    | 1            | SAC         |  |
| SPD-5  | 2                     | G   | 7      | 1st-25               | TCG     | GGG     | 9    | Ser  | Ala  | ++    | -                | +++     | yes    | 2            | missense    |  |
| SPD-5  | 2                     | G   | 7      | 2nd-599              | GTT     | GCT     | 200  | Val  | Ala  | ++    | -                | +++     | yes    | 2            | missense    |  |
| SPD-5  | 2                     | G   | 8      | WT                   | WT      | WT      | WT   | WT   | WT   | +++   | +++              | +++     | no     | 0            | WT          |  |
| SPD-5  | 2                     | G   | 9      | 327                  | GTG     | GTA     | 109  | Val  | Val  | +++   | +++              | +++     | no     | 1            | synonymous  |  |
| SPD-5  | 2                     | G   | 10     | 251                  | GTG     | GAG     | 84   | Val  | Glu  | -     | -                | -       | yes    | 1            | SAC         |  |
| SPD-5  | 2                     | G   | 11     | 721                  | GAA     | AAA     | 241  | Glu  | Lys  | -     | -                | -       | yes    | 1            | SAC         |  |
| SPD-5  | 2                     | G   | 12     | 52                   | CGA     | TGA     | 18   | Arg  | STOP | -     | -                | -       | yes    | 1            | nonsense    |  |
| SPD-5  | 2                     | H   | 1      | 335                  | GAG     | GGG     | 112  | Glu  | Gly  | -     | -                | -       | yes    | 1            | SAC         |  |
| SPD-5  | 2                     | H   | 2      | ND                   | ND      | ND      | ND   | ND   | ND   | -     | -                | -       | yes    | ND           | ND          |  |
| SPD-5  | 2                     | H   | 3      | WT                   | WT      | WT      | WT   | WT   | WT   | -     | -                | -       | yes    | 0            | WT          |  |
| SPD-5  | 2                     | H   | 4      | 1st-599              | GTT     | GCT     | 200  | Val  | Ala  | ++    | -                | +++     | yes    | 2            | SAC         |  |
| SPD-5  | 2                     | H   | 4      | 2nd-606              | ACA     | ACG     | 202  | Thr  | Thr  | ++    | -                | +++     | yes    | 2            | synonymous  |  |
| SPD-5  | 2                     | H   | 5      | 416                  | CTC     | CCC     | 139  | Leu  | Pro  | -     | -                | -       | yes    | 1            | SAC         |  |
| SPD-5  | 2                     | H   | 6      | 801                  | TAC     | CAC     | 201  | Tyr  | His  | -     | -                | +       | yes    | 1            | SAC         |  |
| SPD-5  | 2                     | H   | 7      | 1st-102              | ACA     | ACG     | 34   | Thr  | Thr  | -     | -                | -       | yes    | 2            | synonymous  |  |
| SPD-5  | 2                     | H   | 7      | 2nd-335              | GAG     | GGG     | 112  | Glu  | Gly  | -     | -                | -       | yes    | 2            | SAC         |  |
| SPD-5  | 2                     | H   | 8      | 561                  | TAT     | TAG     | 187  | Tyr  | STOP | -     | -                | -       | yes    | 1            | nonsense    |  |
| SPD-5  | 2                     | H   | 9      | 1st-66               | ACT     | ACC     | 22   | Thr  | Thr  | -     | -                | -       | yes    | 2            | synonymous  |  |
| SPD-5  | 2                     | H   | 9      | 2nd-136              | CAG     | TAG     | 46   | Gln  | STOP | -     | -                | -       | yes    | 2            | nonsense    |  |
| SPD-5  | 2                     | H   | 10     | 1st-635              | GGT     | AGT     | 179  | Gly  | Ser  | -     | -                | -       | yes    | 2            | SAC         |  |
| SPD-5  | 2                     | H   | 10     | 2nd-732              | GGA     | GGG     | 244  | Gly  | Gly  | -     | -                | -       | yes    | 2            | synonymous  |  |
| SPD-5  | 2                     | H   | 11     | 416                  | CTC     | CCC     | 139  | Leu  | Pro  | -     | -                | -       | yes    | 1            | SAC         |  |
| SPD-5  | 2                     | H   | 12     | ND                   | ND      | ND      | ND   | ND   | ND   | -     | -                | -       | yes    | ND           | ND          |  |

**Supplementary Table 3 | Alleles identified in the R-Y2H selection screen against SPD-5. Position in the plates shown in Supplementary Figure 4, sequence information, and interaction scores with CED-4, SPD-5 or F25F8.1 are indicated. Nucleotide #: position of the mutation. Codon-1: wild-type codon. Codon-2: mutant codon. AA #: amino acid position. AA-1: wild-type amino acid. AA-2: mutant amino acid. Grey lines: alleles with multiple mutations (numbered 1st, 2nd, 3rd). ND: No Data. WT: wild-type. F-Y2H retest: confirmation of the loss of interaction with SPD-5 by F-Y2H. Nonsense: nonsense mutation. Missense: missense mutation. Frameshift: frameshift due to an out-of-frame insertion or deletion. Synonymous: synonymous mutation. SAC: single amino acid change.**

## Supplementary Table 4

| Screen  | Location in the plate |     |        | Sequence information |         |         |      |      |      | Interaction with |       |         | F-Y2H Retest | Mutation(s) |      |
|---------|-----------------------|-----|--------|----------------------|---------|---------|------|------|------|------------------|-------|---------|--------------|-------------|------|
|         | Plate                 | Row | Column | nucleotide #         | codon-1 | codon-2 | AA # | AA-1 | AA-2 | CED-4            | SPD-5 | F25F8.1 |              | Number      | Type |
| F25F8.1 | 1                     | A   | 1      | WT                   | WT      | WT      | WT   | WT   | WT   | ND               | ND    | +++     | no           | 0           | WT   |
| F25F8.1 | 1                     | A   | 2      | 263                  | TTC     | TCC     | 88   | Phe  | Ser  | -                | -     | -       | yes          | 1           | SAC  |
| F25F8.1 | 1                     | A   | 3      | WT                   | WT      | WT      | WT   | WT   | WT   | ND               | ND    | +++     | no           | 0           | WT   |
| F25F8.1 | 1                     | A   | 4      | 661                  | TGG     | CGG     | 221  | Trp  | Arg  | ND               | ND    | ++      | no           | 1           | SAC  |
| F25F8.1 | 1                     | A   | 5      | 613                  | TTC     | CTC     | 205  | Phe  | Leu  | ++               | +     | -       | yes          | 1           | SAC  |
| F25F8.1 | 1                     | A   | 6      | 467                  | GTT     | GCT     | 156  | Val  | Ala  | ND               | ND    | ++      | no           | 1           | SAC  |
| F25F8.1 | 1                     | A   | 7      | WT                   | WT      | WT      | WT   | WT   | WT   | ND               | ND    | +++     | no           | 0           | WT   |
| F25F8.1 | 1                     | A   | 8      | WT                   | WT      | WT      | WT   | WT   | WT   | ND               | ND    | +++     | no           | 0           | WT   |
| F25F8.1 | 1                     | A   | 9      | WT                   | WT      | WT      | WT   | WT   | WT   | ND               | ND    | +++     | no           | 0           | WT   |
| F25F8.1 | 1                     | A   | 10     | 431                  | ATC     | ACC     | 144  | Ile  | Thr  | ++               | +     | -       | yes          | 1           | SAC  |
| F25F8.1 | 1                     | A   | 11     | ND                   | ND      | ND      | ND   | ND   | ND   | ND               | ND    | +++     | no           | ND          | ND   |
| F25F8.1 | 1                     | A   | 12     | 550                  | AAA     | GAA     | 184  | Lys  | Glu  | +++              | +++   | -       | yes          | 1           | SAC  |
| F25F8.1 | 1                     | B   | 1      | WT                   | WT      | WT      | WT   | WT   | WT   | ND               | ND    | +++     | no           | 0           | WT   |
| F25F8.1 | 1                     | B   | 2      | 407                  | GAG     | GCG     | 136  | Glu  | Ala  | +++              | +++   | -       | yes          | 1           | SAC  |
| F25F8.1 | 1                     | B   | 3      | 449                  | CAG     | CGG     | 150  | Gln  | Arg  | ND               | ND    | ++      | no           | 1           | SAC  |

**Supplementary Table 4** | Alleles identified in the Y2H screen against F25F8.1. Position in the screen plates shown in Supplementary Figure 5, sequence information, and interaction scores with CED-4, SPD-5 or F25F8.1 are indicated. Nucleotide #: position of the mutation. Codon-1: wild-type codon. Codon-2: mutant codon. AA #: amino acid position. AA-1: wild-type amino acid. AA-2: mutant amino acid. ND: No Data. WT: wild-type. F-Y2H retest: confirmation of the loss of interaction with F25F8.1 by F-Y2H. Nonsense: nonsense mutation. Missense: missense mutation. Frameshift: frameshift due to an out-of-frame insertion or deletion. Synonymous: synonymous mutation. SAC: single amino acid change.



## Supplementary Table 5

| Defective for          | Position  | Allele    |           | Interaction with |       |         | References of yeast-two hybrid phenotyping                                       |                                                                                                              |
|------------------------|-----------|-----------|-----------|------------------|-------|---------|----------------------------------------------------------------------------------|--------------------------------------------------------------------------------------------------------------|
|                        |           | Wild-Type | Mutant    | CED-4            | SPD-5 | F25F8.1 | #                                                                                | Position in the plates                                                                                       |
| CED-4                  | 79        | Asp (GAT) | Ala (GCT) | -                | ++    | +++     | 1                                                                                | SFig3.II.E4                                                                                                  |
|                        | 79        | Asp (GAT) | Gly (GGT) | -                | +     | +++     | 7                                                                                | SFig3.I.B3; I.B5; I.C2; I.D1; I.E4; I.H2; II.C2                                                              |
|                        | 100       | Phe (TTT) | Leu (CTT) | -                | +++   | +++     | 1                                                                                | SFig3.I.H6                                                                                                   |
|                        | 105       | Leu (TTG) | Ser (TCG) | -                | ++    | ++      | 1                                                                                | SFig3.II.D10                                                                                                 |
|                        | 106       | Pro (CCG) | Gln (CAG) | -                | ++    | ++      | 1                                                                                | SFig3.I.B6                                                                                                   |
|                        | 106       | Pro (CCG) | Leu (CTG) | -                | ++    | ++      | 4                                                                                | SFig3.I.D10; II.A10; II.B5; II.D12                                                                           |
|                        | 143       | Arg (AGA) | Gly (GGA) | -                | +++   | +       | 2                                                                                | SFig3.I.C4; II.C3                                                                                            |
| 207                    | Lys (AAA) | Glu (GAA) | -         | +++              | +++   | 2       | SFig3.II.A8; II.E6                                                               |                                                                                                              |
| SPD-5                  | 73        | Trp (TGG) | Arg (CGG) | ++               | -     | ++      | 3                                                                                | SFig4.I.B12; I.C10; II.F5                                                                                    |
|                        | 77        | Arg (AGG) | Gly (GGG) | +                | -     | ++      | 2                                                                                | SFig4.I.D2; I.D4                                                                                             |
|                        | 77        | Arg (AGG) | Ser (AGC) | ++               | -     | +++     | 1                                                                                | SFig4.I.A5                                                                                                   |
|                        | 82        | Gly (GGA) | Glu (GAA) | ++               | -     | ++      | 1                                                                                | SFig4.I.B2                                                                                                   |
|                        | 110       | Gln (CAA) | Arg (CGA) | +                | -     | +       | 2                                                                                | SFig4.I.A10; II.B7                                                                                           |
|                        | 145       | Ser (TCA) | Pro (CCA) | ++               | -     | +++     | 4                                                                                | SFig4.I.D1; II.A9; II.C6; II.F6                                                                              |
|                        | 147       | Ser (TCA) | Pro (CCA) | +++              | -     | +++     | 1                                                                                | SFig4.I.C8                                                                                                   |
|                        | 168       | Tyr (TAT) | His (CAT) | ++               | -     | ++      | 1                                                                                | SFig4.I.C1                                                                                                   |
|                        | 200       | Val (GTT) | Ala (GCT) | ++               | -     | +++     | 1                                                                                | SFig4.II.H4                                                                                                  |
|                        | 214       | Trp (TGG) | Arg (CGG) | ++               | -     | ++      | 3                                                                                | SFig4.I.A9; I.B10; II.D9                                                                                     |
| 220                    | Ser (AGC) | Gly (GGC) | ++        | -                | ++    | 1       | SFig4.I.D10                                                                      |                                                                                                              |
| 220                    | Ser (AGC) | Ile (ATC) | ++        | -                | +++   | 1       | SFig4.I.B4                                                                       |                                                                                                              |
| F25F8.1                | 136       | Glu (GAG) | Ala (GCG) | +++              | +++   | -       | 1                                                                                | SFig5.I.B2                                                                                                   |
|                        | 144       | Ile (ATC) | Thr (ACC) | ++               | +     | -       | 1                                                                                | SFig5.I.A10                                                                                                  |
|                        | 184       | Lys (AAA) | Glu (GAA) | +++              | +++   | -       | 1                                                                                | SFig5.I.A12                                                                                                  |
|                        | 205       | Phe (TTC) | Leu (CTC) | ++               | +     | -       | 1                                                                                | SFig5.I.A5                                                                                                   |
| CED-4 & SPD-5          | 78        | Leu (CTT) | Pro (CCT) | -                | -     | ++      | 4                                                                                | SFig3.I.G8; II.A12; SFig4.I.A1; II.E11                                                                       |
|                        | 81        | Glu (GAG) | Gly (GGG) | -                | -     | +++     | 5                                                                                | SFig3.I.D2; I.E2; I.E10; II.B11; II.G9                                                                       |
|                        | 81        | Glu (GAG) | Lys (AAG) | -                | -     | ++      | 1                                                                                | SFig3.I.H9                                                                                                   |
|                        | 82        | Gly (GGA) | Arg (AGA) | -                | -     | +       | 1                                                                                | SFig3.I.D5                                                                                                   |
|                        | 83        | Phe (TTT) | Leu (CTT) | -                | -     | ++      | 5                                                                                | SFig3.I.E6; I.E9; II.H6; SFig4.I.A2; II.D10                                                                  |
|                        | 83        | Phe (TTT) | Ser (TCT) | -                | -     | +       | 2                                                                                | SFig4.II.B12; II.D5                                                                                          |
|                        | 103       | Pro (CCG) | Gln (CAG) | -                | -     | ++      | 1                                                                                | SFig3.II.B12                                                                                                 |
|                        | 106       | Pro (CCG) | Arg (CGG) | -                | -     | +       | 1                                                                                | SFig3.II.E12                                                                                                 |
|                        | 110       | Gln (CAA) | Pro (CCA) | -                | -     | +       | 1                                                                                | SFig3.II.D5                                                                                                  |
|                        | 112       | Glu (GAG) | Lys (AAG) | -                | -     | +       | 1                                                                                | SFig3.I.C1                                                                                                   |
|                        | 146       | Phe (TTT) | Leu (CTT) | -                | -     | +       | 2                                                                                | SFig3.II.B7; II.C8                                                                                           |
|                        | 156       | Val (GTT) | Ala (GCT) | -                | -     | +       | 1                                                                                | SFig3.II.C1                                                                                                  |
|                        | 197       | Asn (AAC) | Asp (GAC) | -                | -     | +++     | 1                                                                                | SFig3.II.D8                                                                                                  |
|                        | 201       | Tyr (TAC) | His (CAC) | -                | -     | +       | 2                                                                                | SFig4.II.D11; II.H6                                                                                          |
| 203                    | Ser (TCG) | Leu (TTG) | -         | -                | ++    | 2       | SFig3.I.A9; II.A2                                                                |                                                                                                              |
| 221                    | Trp (TGG) | Arg (CGG) | -         | -                | +     | 3       | SFig4.I.C3; II.A12; II.B10                                                       |                                                                                                              |
| SPD-5 & F25F8.1        | 172       | Ile (ATA) | Arg (AGA) | +                | -     | -       | 1                                                                                | SFig4.I.C11                                                                                                  |
|                        | 174       | Leu (CTA) | Pro (CCA) | ++               | -     | -       | 4                                                                                | SFig3.II.F6; SFig4.I.C7; II.A7; II.D4                                                                        |
| CED-4, SPD-5 & F25F8.1 | 84        | Val (GTG) | Glu (GAG) | -                | -     | -       | 2                                                                                | SFig3.II.F8; SFig4.II.G10                                                                                    |
|                        | 87        | Tyr (TAT) | Asn (AAT) | -                | -     | -       | 1                                                                                | SFig4.I.B3                                                                                                   |
|                        | 88        | Phe (TTC) | Ser (TCC) | -                | -     | -       | 3                                                                                | SFig3.II.G1; II.G3; SFig5.I.A2                                                                               |
|                        | 89        | Thr (ACG) | Pro (CCG) | -                | -     | -       | 1                                                                                | SFig3.II.G7                                                                                                  |
|                        | 99        | Trp (TGG) | Arg (CGG) | -                | -     | -       | 1                                                                                | SFig4.II.G1                                                                                                  |
|                        | 112       | Glu (GAG) | Arg (AGG) | -                | -     | -       | 1                                                                                | SFig4.II.D12                                                                                                 |
|                        | 112       | Glu (GAG) | Gly (GGG) | -                | -     | -       | 14                                                                               | SFig3.I.C5; I.C12; I.H7; II.B1; II.D6; II.E10; SFig4.I.C12; II.B4; II.D3; II.E12; II.G5; II.G6; II.H1; II.H7 |
|                        | 113       | His (CAC) | Arg (CGC) | -                | -     | -       | 3                                                                                | SFig3.I.B1; II.H10; SFig4.II.B3                                                                              |
|                        | 116       | Met (ATG) | Arg (AGG) | -                | -     | -       | 1                                                                                | SFig4.I.A8                                                                                                   |
|                        | 120       | Gly (GGA) | Arg (AGA) | -                | -     | -       | 1                                                                                | SFig3.I.B11                                                                                                  |
|                        | 120       | Gly (GGA) | Glu (GAA) | -                | -     | -       | 1                                                                                | SFig3.II.C11                                                                                                 |
|                        | 124       | Glu (GAG) | Lys (AAG) | -                | -     | -       | 1                                                                                | SFig4.I.C2                                                                                                   |
|                        | 138       | Leu (CTG) | Pro (CCG) | -                | -     | -       | 3                                                                                | SFig3.I.G6; I.H10; II.C7                                                                                     |
|                        | 139       | Leu (CTC) | Pro (CCC) | -                | -     | -       | 3                                                                                | SFig3.II.H8; SFig4.II.H5; II.H11                                                                             |
|                        | 148       | Leu (CTG) | Pro (CCG) | -                | -     | -       | 2                                                                                | SFig4.I.B8; II.F3                                                                                            |
|                        | 149       | Tyr (TAT) | Cys (TGT) | -                | -     | -       | 1                                                                                | SFig4.II.C3                                                                                                  |
|                        | 149       | Tyr (TAT) | His (CAT) | -                | -     | -       | 2                                                                                | SFig3.II.B9; II.G10                                                                                          |
|                        | 152       | Val (GTG) | Glu (GAG) | -                | -     | -       | 1                                                                                | SFig3.II.D2                                                                                                  |
|                        | 176       | Ser (TCG) | Leu (TTG) | -                | -     | -       | 1                                                                                | SFig4.II.C2                                                                                                  |
|                        | 176       | Ser (TCG) | Pro (CCG) | -                | -     | -       | 8                                                                                | SFig3.I.A11; I.E1; I.E8; II.B4; II.E5; II.E8; II.G12; SFig4.II.B1                                            |
|                        | 179       | Gly (GGT) | Asp (GAT) | -                | -     | -       | 2                                                                                | SFig3.I.C10; I.F4                                                                                            |
|                        | 179       | Gly (GGT) | Ile (ATT) | -                | -     | -       | 1                                                                                | SFig4.II.E4                                                                                                  |
|                        | 179       | Gly (GGT) | Ser (AGT) | -                | -     | -       | 1                                                                                | SFig4.II.H10                                                                                                 |
|                        | 198       | Leu (CTC) | Pro (CCC) | -                | -     | -       | 8                                                                                | SFig3.I.E11; II.C6; II.D11; SFig4.I.B1; I.C4; II.B9; II.F1; II.F12                                           |
| 202                    | Thr (ACA) | Pro (CCA) | -         | -                | -     | 2       | SFig3.I.G9; II.E2                                                                |                                                                                                              |
| 203                    | Ser (TCG) | Pro (CCG) | -         | -                | -     | 3       | SFig3.I.E7; I.G7; SFig4.II.C8                                                    |                                                                                                              |
| 204                    | Leu (CTG) | Pro (CCG) | -         | -                | -     | 10      | SFig3.I.C3; I.D4; I.F9; II.B2; II.G11; SFig4.II.C11; II.C12; II.F4; II.F8; II.F9 |                                                                                                              |
| 224                    | Phe (TTC) | Ser (TCC) | -         | -                | -     | 2       | SFig4.I.C5; II.C4                                                                |                                                                                                              |
| 227                    | Leu (CTC) | Pro (CCC) | -         | -                | -     | 2       | SFig4.I.B11; II.C5                                                               |                                                                                                              |
| 241                    | Glu (GAA) | Lys (AAA) | -         | -                | -     | 1       | SFig4.II.G11                                                                     |                                                                                                              |

**Supplementary Table 5** | Single amino acid change alleles. The number of times the allele was found in the screens is indicated (#) with the reference to the corresponding positions in the plates presented in Supplementary Figures 3-5.

### Supplementary Data 1: Isolation of *ced-9* edgetic alleles insensitive to EGL-1

To isolate CED-9(G169E)-like alleles we first tested whether Y2H is suitable to: (i) detect the CED-9/CED-4 interaction, (ii) reconstitute the EGL-1-induced dissociation of this interaction, and (iii) recapitulate the CED-9(G169E) edgetic profile (**Fig. 2a**). Yeast cells expressing DB-CED-9 $\Delta$ TM [the Gal4-DNA binding domain (DB) fused to CED-9 lacking its C-terminal transmembrane domain] together with AD-CED-4 [the Gal4-activation domain (AD) fused to full-length CED-4] show a clear Y2H interaction: high *GAL1::lacZ*-induced  $\beta$ -galactosidase ( $\beta$ -gal) activity and *SPAL10::URA3*-dependent growth<sup>1</sup> on selective media lacking uracil (-URA) (**Fig. 2b**). When EGL-1 is co-expressed together with DB-CED-9 $\Delta$ TM and AD-CED-4, the CED-9/CED-4 interaction is sharply reduced, as evidenced by diminished  $\beta$ -gal activity and lack of growth on -URA plates (**Fig. 2b**). The G169E substitution in CED-9 only mildly affects its interaction with CED-4. In striking contrast to the wild-type CED-9/CED-4 interaction, CED-9(G169E)/CED-4 is significantly less affected by EGL-1, as indicated by a small reduction of  $\beta$ -gal activity [only 27% of inhibition compared to 78% ( $P = 2 \times 10^{-5}$ )] and, more importantly, by unaffected growth on -URA media (**Fig. 2b**). This observation recapitulates previous findings<sup>2-4</sup> and suggests that our modified Y2H assay can effectively select new *ced-9* edgetic alleles insensitive to EGL-1-induced dissociation.

To generate a CED-9 $\Delta$ TM mutant library, the ORF was PCR mutagenized and subsequently cloned by Gateway reaction into pDONR-Express, a bacterial expression vector containing a kanamycin (Kan) resistance-encoding gene placed in frame with the ORF cloning site<sup>5,6</sup> (**Fig. 2c**). The selection of *E. coli* transformants on Kan-containing

plates is designed to eliminate nonsense mutations and out-of-frame changes, enriching the library with full-length ORFs (**Supplementary Table 1**). To identify CED-9(G169E)-like edgetic alleles in yeast, we selected from the CED-9 $\Delta$ TM library the mutant maintaining the interaction with CED-4 in the presence of EGL-1, as indicated by growth on –URA plates (**Fig. 2a**).

### **Supplementary Data 2: Isolation of additional *ced-9* edgetic alleles**

We selected by R-Y2H CED-9 mutants unable to interact with either CED-4 or SPD-5, using *SPAL10::URA3*, a counter-selectable reporter gene whose expression causes toxicity in the presence of 5-fluoroorotic acid (5-FOA) (**Fig. 3**). Interaction-disruptive mutations can be selected based on their ability to enable yeast cells to grow in the presence of 5-FOA. Yeast cells were co-transformed with AD-CED-4 or AD-SPD-5-Cter together with the DB-CED-9 $\Delta$ TM mutant library (**Fig. 3**) and 5-FOA-resistant colonies were retained for further analysis. Since the CED-9/F25F8.1 interaction does not confer 5-FOA sensitivity, we developed an alternative strategy: yeast cells were co-transformed with AD-F25F8.1 and the DB-CED-9 $\Delta$ TM mutant library and colonies were screened for decreased *GAL1::lacZ*-induced  $\beta$ -gal activity. A total of 351 potential *ced-9* alleles were obtained, comprising 192, 144, and 15 unable to interact with CED-4, SPD-5, and F25F8.1, respectively.

PCR amplicons of *ced-9* alleles obtained directly from yeast colonies were sequenced to identify potential mutations (**Fig. 3**) and reintroduced by gap-repair into fresh yeast cells to confirm loss-of-interaction phenotypes by assessing *GAL1::lacZ*-induced  $\beta$ -gal activity and *GAL1::HIS3*-dependent growth on selective media lacking

histidine (–HIS) (**Fig. 3, Supplementary Figs. 3-5, Supplementary Tables 2-4**). Among the 351 amplicons, 294 were successfully sequenced in their entirety, of which 177 (60%) contained single non-synonymous missense mutations. The remaining amplicons were wild-type (8%) or carried nonsense (15%), frameshift (7%), or multiple missense mutations (10%). In addition, we confirmed the loss-of-interaction phenotype for 309 out of 351 *ced-9* ORFs (88%). After collapsing confirmed interaction-defective alleles with identical sequences we identified a total of 72 distinct single amino acid changes affecting 57 (~23% of CED-9 $\Delta$ TM sequence) different positions in the CED-9 $\Delta$ TM-encoding sequence (**Supplementary Table 5**). These results attest to the efficacy of the mutagenesis and of the R-Y2H selections.

The interaction-defective alleles were subsequently tested by Y2H against other CED-9 partners to distinguish between edgetic and non-edgetic alleles. Edgetic alleles are those that maintain the capacity to bind to at least one CED-9 partner (**Fig., Supplementary Figs. 3-5, Supplementary Tables 2-5**). As before, the interactions were assessed by  $\beta$ -gal activity and growth on –HIS. Out of the 72 interaction-defective alleles, we found 42 alleles with an edgetic profile, each affecting one of 33 different amino acids along the CED-9 sequence (~13% of the sequence, **Supplementary Table 5**). In contrast, 30 alleles impair all CED-9 binding capacities and therefore are considered non-edgetic.

To validate the interaction profiles of selected edgetic alleles, we used co-affinity purification (co-AP) pull-downs in human HEK293T cells as an orthogonal protein interaction assay<sup>7-9</sup>. We particularly wanted to both confirm which alleles perturb single interactions and to identify those with the strongest interaction defect. We tested 16



partner-specific edgetic alleles, five defective for CED-4, nine for SPD-5, and two for F25F8.1, for their ability to bind all four CED-9 interactors mentioned above (**Supplementary Fig. 6**). Since the proteins to be tested tend to be expressed at much higher levels in human HEK293T cells than in yeast, we expected some alleles to behave somewhat differently between the two assays<sup>7</sup>. This appears to be the case for the two F25F8.1-specific and four CED-4-specific Y2H edgetic alleles. All such four CED-4-specific alleles correspond to mutations of CED-9 residues that are in direct contact with CED-4, strongly supporting their relevance. We confirmed the interaction profile for the ten remaining alleles, one that fails to bind CED-4 and nine that fail to bind SPD-5, while the other three interactions were maintained at wild-type or near wild-type levels. Thus, a substantial proportion of edgetic alleles obtained using the R-Y2H could be validated by co-AP.

### **Supplementary Data 3: Structural analysis of edgetic and non-edgetic residues**

To assess whether affected residues are preferentially located in protein binding sites, we quantified their surface exposure in the CED-9 tertiary structure (**Fig. 4a**). We defined as solvent-accessible those residues that have 10% or more of solvent-accessible surface area (ASA) in at least one of the three available CED-9 crystal structures<sup>10-12</sup>. This criterion takes into account variations between these three structures. Of the 19 residues mutated in the edgetic alleles defective for only one interaction, 16 (84%) are solvent-accessible, whereas only seven out of the 23 (30%) non-edgetic residues fall into this category (**Fig. 4b**). The 16 residues mutated in edgetic alleles defective for two interactions present an intermediate profile with 11

solvent-accessible residues (69%). ASA cutoffs of 20 or 30% gave similar results, while for the set of alleles defective for two interactions the proportion of accessible residues decreased more severely with the cutoff increase than for the other two sets (**Data not shown**).

To evaluate the probability of finding similar distributions by chance we compared the average relative ASA of the 19 residues mutated in edgetic alleles defective for one interaction, of the 16 residues mutated in edgetic alleles defective for two interactions, and of the 23 non-edgetic residues, to the averages obtained for 1,000,000 sets of the same number of residues picked at random in CED-9. Residues mutated in alleles defective for one interaction are slightly more exposed on average (**Supplementary Fig. 7**), but the difference is not significant ( $P = 0.38$ ), while for the other two sets, the average relative ASA is significantly lower than expected by chance (**Supplementary Fig. 7**), especially for the non-edgetic set ( $P = 0.028$  and  $P < 10^{-6}$  for the alleles defective for two and three interactions, respectively).

These observations suggest that non-edgetic alleles are defective for all interactions because of a disrupted CED-9 tertiary structure. In contrast, edgetic alleles defective for only one interaction contain substitutions of accessible residues likely to be part of interaction regions. The low significance of surface enrichment found for this set is most likely due to the small size of CED-9, which has 74% (121 out of 163) of solvent-accessible residues (average relative ASA ~28%) (**Fig. 4b** and **Supplementary Fig. 7**). The residues mutated in alleles defective for two interactions show poor solvent-accessibility. The higher proportion of accessible residues with a moderate exposure

cutoff (10-30% ASA) in the set of alleles defective for two interactions indicates that these residues are close to the CED-9 surface and are likely near interaction sites.

#### **Supplementary Data 4: SPD-5 and F25F8.1 binding sites on the CED-9 structure**

Having found that edgetic residues are more likely to be located in the vicinity of binding sites, we next used our sets of edgetic residues to map the putative binding sites for SPD-5 and F25F8.1. There is no obvious clustering of edgetic residues for a specific partner in the CED-9 sequence, suggesting that the binding sites for SPD-5 and F25F8.1, like the CED-4-binding site<sup>11</sup>, are conformational (**Fig. 5a**). The four BCL2 Homology domains (BH domains) that encompass 33% of the length of CED-9 $\Delta$ TM are not enriched for edgetic residues, since only 11 out of 33 residues (33%) fall into these domains.

On the CED-9 tertiary structure the residues mutated in the SPD-5 edgetic alleles cluster together (**Fig. 5b**). While a portion of this putative SPD-5 interaction site is not in contact with CED-4 in the CED-9/CED-4 co-crystal, it partially overlaps with the CED-4-binding site, consistent with the isolation of edgetic alleles defective for both CED-4 and SPD-5 (**Supplementary Table 5**). Since EGL-1 binding to CED-9 induces conformational changes affecting the CED-4 binding site and preventing CED-9/CED-4 interaction<sup>11</sup>, we wondered if EGL-1 binding to CED-9 also interferes with CED-9/SPD-5 interaction. When EGL-1 was co-expressed with DB-CED-9 $\Delta$ TM and AD-SPD-5 in yeast, the CED-9/SPD-5 interaction was sharply reduced, as evidenced by diminished  $\beta$ -gal activity (**Supplementary Fig. 9**). By contrast, CED-4 expression was unable to prevent CED-9/SPD-5 interaction (**Supplementary Fig. 10**). This suggests that the

CED-9/SPD-5 complex is highly stable and can resist CED-4 competitive binding whereas it is efficiently disrupted by the EGL-1-binding and/or by the EGL-1-induced allosteric transition<sup>12</sup>.

Mapping the F25F8.1 binding site was less reliable, since only six edgetic alleles were identified (**Fig. 5c**). The F25F8.1 binding site seems to be located on the opposite side from the CED-4 and SPD-5 binding sites, similarly to the EGL-1 BH3 domain-binding groove. Surprisingly, EGL-1 expression was found to increase  $\beta$ -gal activity when co-expressed in yeast cells with DB-CED-9 $\Delta$ TM and AD-F25F8.1, suggesting that EGL-1 binding may stabilize the CED-9/F25F8.1 interaction (**Supplementary Fig. 9**). This result suggests that EGL-1 and F25F8.1 interaction sites are close but distinct, and that CED-9, EGL-1, and F25F8.1 might form a ternary complex.

Although the CED-9 interaction surfaces seem intricate, with partly overlapping sites, our edgetic strategy enabled the isolation of partner-specific edgetic alleles for each CED-9 partner. These alleles carry mutations of a residue either in binding-site specific regions (e.g. R77 or F100), or in overlapping regions (e.g. D79 or V200) (**Fig. 5b,c**). Our platform is powerful enough to isolate edgetic alleles substituted for the same residue but with different interaction profiles: P106Q and P106L mutations lead to the loss of CED-9/CED-4 interaction only, while P106R also disrupts the CED-9/SPD-5 interaction. Similarly, CED-9(G82E) and CED-9(Q110R) are SPD-5-defective, while CED-9(G82R) and CED-9(Q110P) are defective for both CED-4 and SPD-5.

## REFERENCES

1. Vidal, M., Brachmann, R.K., Fattaey, A., Harlow, E. & Boeke, J.D. Reverse two-hybrid and one-hybrid systems to detect dissociation of protein-protein and DNA-protein interactions. *Proc. Natl. Acad. Sci. USA* **93**, 10315-10320 (1996).
2. del Peso, L., Gonzalez, V.M., Inohara, N., Ellis, R.E. & Nunez, G. Disruption of the CED-9.CED-4 complex by EGL-1 is a critical step for programmed cell death in *Caenorhabditis elegans*. *J. Biol. Chem.* **275**, 27205-27211 (2000).
3. del Peso, L., Gonzalez, V.M. & Nunez, G. *Caenorhabditis elegans* EGL-1 disrupts the interaction of CED-9 with CED-4 and promotes CED-3 activation. *J. Biol. Chem.* **273**, 33495-33500 (1998).
4. Conradt, B. & Horvitz, H.R. The *C. elegans* protein EGL-1 is required for programmed cell death and interacts with the Bcl-2-like protein CED-9. *Cell* **93**, 519-529 (1998).
5. Kritikou, E.A. *et al.* *C. elegans* GLA-3 is a novel component of the MAP kinase MPK-1 signaling pathway required for germ cell survival. *Genes Dev.* **20**, 2279-2292 (2006).
6. Gray, P.N., Busser, K.J. & Chappell, T.G. A novel approach for generating full-length, high coverage allele libraries for the analysis of protein interactions. *Mol. Cell. Proteomics* **6**, 514-526 (2007).
7. Braun, P. *et al.* An experimentally derived confidence score for binary protein-protein interactions. *Nat. Methods* **6**, 91-97 (2009).
8. Li, S. *et al.* A map of the interactome network of the metazoan *C. elegans*. *Science* **303**, 540-543 (2004).
9. Rual, J.F. *et al.* Towards a proteome-scale map of the human protein-protein interaction network. *Nature* **437**, 1173-1178 (2005).
10. Woo, J.S. *et al.* Unique structural features of a BCL-2 family protein CED-9 and biophysical characterization of CED-9/EGL-1 interactions. *Cell Death Differ.* **10**, 1310-1319 (2003).
11. Yan, N. *et al.* Structure of the CED-4-CED-9 complex provides insights into programmed cell death in *Caenorhabditis elegans*. *Nature* **437**, 831-837 (2005).
12. Yan, N. *et al.* Structural, biochemical, and functional analyses of CED-9 recognition by the proapoptotic proteins EGL-1 and CED-4. *Mol. Cell* **15**, 999-1006 (2004).
